# Supplementary material for: Interactions between chaperone and energy storage networks during the evolution of Legionella pneumophila under heat shock
Source: PeerJ. 2024 Apr 30;12:e17197. doi: 10.7717/peerj.17197 (PMC11067923; doi:10.7717/peerj.17197)
Supplement: Supplemental Information 4 — NCBI filename (including RefSeq and NCBI Genome assembly accession numbers) and legible genome names used to conduct genomegaMap dN/dS analysis figure S1 [file peerj-12-17197-s004.xlsx]

## Sheet: genome_data
File Name and Accession	Genome Name
GCA_000008485.1_ASM848v1_genomic.fna	AE017354.1 Legionella pneumophila subsp. pneumophila str. Philadelphia 1, complete genome
GCA_000048645.1_ASM4864v1_genomic.fna	CR628336.1 Legionella pneumophila str. Paris complete genome
GCA_000048665.1_ASM4866v1_genomic.fna	CR628337.1 Legionella pneumophila str. Lens complete genome
GCA_000092545.1_ASM9254v1_genomic.fna	CP000675.2 Legionella pneumophila str. Corby, complete genome
GCA_000092625.1_ASM9262v1_genomic.fna	CP001828.1 Legionella pneumophila 2300/99 Alcoy, complete genome
GCA_000239175.1_ASM23917v1_genomic.fna	CP003192.1 Legionella pneumophila subsp. pneumophila ATCC 43290, complete genome
GCA_000306845.1_ASM30684v1_genomic.fna	FQ958211.1 Legionella pneumophila subsp. pneumophila str. HL06041035 chromosome, complete genome
GCA_000306865.1_ASM30686v1_genomic.fna	FQ958210.1 Legionella pneumophila subsp. pneumophila str. Lorraine chromosome, complete genome
GCA_000347615.1_ASM34761v1_genomic.fna	CP003885.1 Legionella pneumophila subsp. pneumophila LPE509, complete genome
GCA_000404245.1_ASM40424v1_genomic.fna	CP003730.1 Legionella pneumophila subsp. pneumophila str. Thunder Bay, complete genome
GCA_001590615.2_ASM159061v2_genomic.fna	CP014255.2 Legionella pneumophila subsp. pascullei strain F-4185, complete genome
GCA_001590645.1_ASM159064v1_genomic.fna	CP014256.1 Legionella pneumophila subsp. pascullei strain D-7158 chromosome, complete genome
GCA_001590695.1_ASM159069v1_genomic.fna	CP014257.1 Legionella pneumophila subsp. pascullei strain D-7119, complete genome
GCA_001592705.1_ASM159270v1_genomic.fna	CP012019.1 Legionella pneumophila subsp. pneumophila strain Toronto-2005 chromosome, complete genome
GCA_001610735.1_ASM161073v1_genomic.fna	CP011105.1 Legionella pneumophila strain L10-023, complete genome
GCA_001652645.1_ASM165264v1_genomic.fna	CP015342.1 Legionella pneumophila strain D-7632 chromosome, complete genome
GCA_001652665.1_ASM165266v1_genomic.fna	CP015343.1 Legionella pneumophila strain D-7631 chromosome, complete genome
GCA_001652685.1_ASM165268v1_genomic.fna	CP015344.1 Legionella pneumophila strain D-7630 chromosome, complete genome
GCA_001677075.2_ASM167707v2_genomic.fna	CP016030.2 Legionella pneumophila strain OLDA, complete genome
GCA_001677115.2_ASM167711v2_genomic.fna	CP016029.2 Legionella pneumophila strain Pontiac, complete genome
GCA_001752705.1_ASM175270v1_genomic.fna	CP015925.1 Legionella pneumophila strain E10_P chromosome, complete genome
GCA_001752725.1_ASM175272v1_genomic.fna	CP015926.1 Legionella pneumophila strain E11_U, complete genome
GCA_001752745.1_ASM175274v1_genomic.fna	CP015927.1 Legionella pneumophila strain Philadelphia_1_ATCC chromosome, complete genome
GCA_001752765.1_ASM175276v1_genomic.fna	CP015928.1 Legionella pneumophila strain Philadelphia_1_CDC chromosome, complete genome
GCA_001752785.1_ASM175278v1_genomic.fna	CP015929.1 Legionella pneumophila strain Philadelphia_2 chromosome, complete genome
GCA_001752805.1_ASM175280v1_genomic.fna	CP015930.1 Legionella pneumophila strain Philadelphia_3 chromosome, complete genome
GCA_001752825.1_ASM175282v1_genomic.fna	CP015931.1 Legionella pneumophila strain Philadelphia_4 chromosome, complete genome
GCA_001752845.1_ASM175284v1_genomic.fna	CP015932.1 Legionella pneumophila strain C1_S chromosome, complete genome
GCA_001752865.1_ASM175286v1_genomic.fna	CP015933.1 Legionella pneumophila strain C2_S chromosome, complete genome
GCA_001752885.1_ASM175288v1_genomic.fna	CP015934.1 Legionella pneumophila strain C3_O chromosome, complete genome
GCA_001752905.1_ASM175290v1_genomic.fna	CP015935.1 Legionella pneumophila strain C4_S chromosome, complete genome
GCA_001752925.1_ASM175292v1_genomic.fna	CP015936.1 Legionella pneumophila strain C5_P chromosome, complete genome
GCA_001752945.1_ASM175294v1_genomic.fna	CP015937.1 Legionella pneumophila strain C6_S chromosome, complete genome
GCA_001752965.1_ASM175296v1_genomic.fna	CP015938.1 Legionella pneumophila strain C7_O chromosome, complete genome
GCA_001753065.1_ASM175306v1_genomic.fna	CP015939.1 Legionella pneumophila strain C8_S chromosome, complete sequence
GCA_001753085.1_ASM175308v1_genomic.fna	CP015941.1 Legionella pneumophila strain C9_S chromosome, complete sequence
GCA_001753105.1_ASM175310v1_genomic.fna	CP015944.1 Legionella pneumophila strain C10_S chromosome, complete genome
GCA_001753125.1_ASM175312v1_genomic.fna	CP015945.1 Legionella pneumophila strain C11_O chromosome, complete genome
GCA_001753145.1_ASM175314v1_genomic.fna	CP015946.1 Legionella pneumophila strain E1_P chromosome, complete genome
GCA_001753265.1_ASM175326v1_genomic.fna	CP015947.1 Legionella pneumophila strain E2_N chromosome, complete sequence
GCA_001753285.1_ASM175328v1_genomic.fna	CP015949.1 Legionella pneumophila strain E3_N chromosome, complete genome
GCA_001753305.1_ASM175330v1_genomic.fna	CP015950.1 Legionella pneumophila strain E4_N chromosome, complete genome
GCA_001753325.1_ASM175332v1_genomic.fna	CP015951.1 Legionella pneumophila strain E5_N chromosome, complete sequence
GCA_001753345.1_ASM175334v1_genomic.fna	CP015953.1 Legionella pneumophila strain E6_N chromosome, complete genome
GCA_001753365.1_ASM175336v1_genomic.fna	CP015954.1 Legionella pneumophila strain E7_O chromosome, complete genome
GCA_001753385.1_ASM175338v1_genomic.fna	CP015955.1 Legionella pneumophila strain E8_O chromosome, complete genome
GCA_001753405.1_ASM175340v1_genomic.fna	CP015956.1 Legionella pneumophila strain E9_O chromosome, complete genome
GCA_001766275.1_ASM176627v1_genomic.fna	CP016868.1 Legionella pneumophila subsp. pneumophila strain FFI102, complete genome
GCA_001766295.1_ASM176629v1_genomic.fna	CP016870.1 Legionella pneumophila subsp. pneumophila strain FFI103, complete genome
GCA_001766315.1_ASM176631v1_genomic.fna	CP016872.1 Legionella pneumophila subsp. pneumophila strain FFI104 chromosome, complete genome
GCA_001766335.1_ASM176633v1_genomic.fna	CP016873.1 Legionella pneumophila subsp. pneumophila strain FFI105 chromosome, complete genome
GCA_001766355.1_ASM176635v1_genomic.fna	CP016874.1 Legionella pneumophila subsp. pneumophila strain FFI329, complete genome
GCA_001766375.1_ASM176637v1_genomic.fna	CP016876.1 Legionella pneumophila subsp. pneumophila strain FFI337 chromosome, complete genome
GCA_001886795.1_ASM188679v1_genomic.fna	CP017457.1 Legionella pneumophila subsp. fraseri strain Detroit-1 chromosome, complete genome
GCA_001886835.1_ASM188683v1_genomic.fna	CP017458.1 Legionella pneumophila subsp. fraseri strain Dallas 1E chromosome, complete genome
GCA_001941585.1_ASM194158v1_genomic.fna	CP013742.1 Legionella pneumophila strain Philadelphia-1 isolate AE chromosome, complete genome
GCA_001969405.1_ASM196940v1_genomic.fna	CP014760.1 Legionella pneumophila strain F4469 chromosome, complete genome
GCA_001989475.1_ASM198947v1_genomic.fna	CP014759.1 Legionella pneumophila strain F4468 chromosome, complete genome
GCA_002813715.1_ASM281371v1_genomic.fna	CP017601.1 Legionella pneumophila strain D6026 chromosome, complete genome
GCA_002813735.1_ASM281373v1_genomic.fna	CP017602.1 Legionella pneumophila strain D5945 chromosome, complete genome
GCA_003003515.1_ASM300351v1_genomic.fna	CP021256.1 Legionella pneumophila strain D-4954 chromosome, complete genome
GCA_003003535.1_ASM300353v1_genomic.fna	CP021260.1 Legionella pneumophila strain NY24 (D-7706) chromosome, complete genome
GCA_003003555.1_ASM300355v1_genomic.fna	CP021261.1 Legionella pneumophila strain NY23 (D-7705) chromosome, complete genome
GCA_003003595.1_ASM300359v1_genomic.fna	CP021263.1 Legionella pneumophila subsp. fraseri strain D-3137 chromosome, complete genome
GCA_003003675.1_ASM300367v1_genomic.fna	CP021264.1 Legionella pneumophila subsp. fraseri strain D-5387 chromosome, complete genome
GCA_003003755.1_ASM300375v1_genomic.fna	CP021265.1 Legionella pneumophila subsp. fraseri strain Los Angeles 1 (D-7696) chromosome, complete genome
GCA_003003815.1_ASM300381v1_genomic.fna	CP021269.1 Legionella pneumophila subsp. pneumophila strain Bellingham 1 (D-7473) chromosome, complete genome
GCA_003003865.1_ASM300386v1_genomic.fna	CP021257.1 Legionella pneumophila subsp. fraseri strain Lansing 3 chromosome, complete genome
GCA_003003955.1_ASM300395v1_genomic.fna	CP021258.1 Legionella pneumophila subsp. fraseri strain D-5744 chromosome, complete genome
GCA_003004065.1_ASM300406v1_genomic.fna	CP021259.1 Legionella pneumophila strain D-7708 chromosome, complete genome
GCA_003004115.1_ASM300411v1_genomic.fna	CP021262.1 Legionella pneumophila subsp. pascullei strain U8W (D-7160) chromosome, complete genome
GCA_003004135.1_ASM300413v1_genomic.fna	CP021266.1 Legionella pneumophila subsp. pneumophila strain Knoxville 1 (D-7468) chromosome, complete genome
GCA_003004155.1_ASM300415v1_genomic.fna	CP021267.1 Legionella pneumophila subsp. pneumophila strain Burlington 1 (D-7841) chromosome, complete genome
GCA_003004175.1_ASM300417v1_genomic.fna	CP021268.1 Legionella pneumophila subsp. pneumophila strain Birmingham 1 (D-7470) chromosome, complete genome
GCA_003004195.1_ASM300419v1_genomic.fna	CP021272.1 Legionella pneumophila strain D-5265 chromosome, complete genome
GCA_003004215.1_ASM300421v1_genomic.fna	CP021277.1 Legionella pneumophila subsp. fraseri strain D-4058 chromosome, complete genome
GCA_003004235.1_ASM300423v1_genomic.fna	CP021274.1 Legionella pneumophila strain D-4040 chromosome, complete genome
GCA_003004255.1_ASM300425v1_genomic.fna	CP021279.1 Legionella pneumophila subsp. fraseri strain F-4198 chromosome, complete genome
GCA_003004275.1_ASM300427v1_genomic.fna	CP021281.1 Legionella pneumophila subsp. pneumophila strain Flint 2 (D-7477) chromosome, complete genome
GCA_003004295.1_ASM300429v1_genomic.fna	CP021283.1 Legionella pneumophila subsp. pneumophila strain Allentown 1 (D-7475) chromosome, complete genome
GCA_003004315.1_ASM300431v1_genomic.fna	CP021286.1 Legionella pneumophila subsp. pneumophila strain Albuquerque 1 (D-7474) chromosome, complete genome
GCA_003004335.1_ASM300433v1_genomic.fna	CP021270.1 Legionella pneumophila strain D-7787 chromosome, complete genome
GCA_006364635.1_ASM636463v1_genomic.fna	CP040987.1 Legionella pneumophila strain FDAARGOS_779 chromosome, complete genome
GCA_009664815.1_ASM966481v1_genomic.fna	CP045974.1 Legionella pneumophila strain AUSMDU00010536 isolate SBT211 chromosome, complete genome
GCA_010669065.1_ASM1066906v1_genomic.fna	CP048618.1 Legionella pneumophila strain ERS1305867 chromosome, complete genome
GCA_014789345.1_ASM1478934v1_genomic.fna	CP061840.1 Legionella pneumophila subsp. pneumophila strain AW-13-4 chromosome, complete genome
GCA_019930765.1_ASM1993076v1_genomic.fna	CP082847.1 Legionella pneumophila strain FDAARGOS_1483 chromosome, complete genome
GCA_019930805.1_ASM1993080v1_genomic.fna	CP082848.1 Legionella pneumophila strain FDAARGOS_1482 chromosome, complete genome
GCA_019974095.1_ASM1997409v1_genomic.fna	AP024961.1 Legionella pneumophila 80-045 DNA, complete genome
GCA_022220445.1_ASM2222044v1_genomic.fna	CP092038.1 Legionella pneumophila strain 11052018-5 chromosome, complete genome
GCA_022870105.1_ASM2287010v1_genomic.fna	CP064378.1 Legionella pneumophila subsp. pneumophila strain PartS-Lpneumophila-RM8376 chromosome, complete genome
GCA_026689395.1_ASM2668939v1_genomic.fna	CP113433.1 Legionella pneumophila strain PATHC034 chromosome, complete genome
GCA_026689415.1_ASM2668941v1_genomic.fna	CP113434.1 Legionella pneumophila strain PATHC027 chromosome, complete genome
GCA_026689435.1_ASM2668943v1_genomic.fna	CP113435.1 Legionella pneumophila strain PATHC025 chromosome, complete genome
GCA_026689455.1_ASM2668945v1_genomic.fna	CP113436.1 Legionella pneumophila strain PATHC021 chromosome, complete genome
GCA_026689475.1_ASM2668947v1_genomic.fna	CP113437.1 Legionella pneumophila strain PATHC007 chromosome, complete genome
GCA_026689495.1_ASM2668949v1_genomic.fna	CP113438.1 Legionella pneumophila strain PATHC003 chromosome, complete genome
GCA_026689515.1_ASM2668951v1_genomic.fna	CP113439.1 Legionella pneumophila strain PATHC002 chromosome, complete genome
GCA_027286265.1_ASM2728626v1_genomic.fna	CP114578.1 Legionella pneumophila strain A194 chromosome, complete genome
GCA_027286285.1_ASM2728628v1_genomic.fna	CP114576.1 Legionella pneumophila strain H3 chromosome, complete genome
GCA_027920565.1_ASM2792056v1_genomic.fna	CP115860.1 Legionella pneumophila 130b chromosome, complete genome
GCA_027920585.1_ASM2792058v1_genomic.fna	CP115861.1 Legionella pneumophila strain SG1-QSBC08 chromosome, complete genome
GCA_027920605.1_ASM2792060v1_genomic.fna	CP115862.1 Legionella pneumophila strain SG1-QEBC09 chromosome, complete genome
GCA_027920625.1_ASM2792062v1_genomic.fna	CP115863.1 Legionella pneumophila strain SG6 chromosome, complete genome
GCA_030168615.1_ASM3016861v1_genomic.fna	CP117814.1 Legionella pneumophila strain D5241 chromosome, complete genome
GCA_030168635.1_ASM3016863v1_genomic.fna	CP117817.1 Legionella pneumophila strain D5573 chromosome, complete genome
GCA_030168655.1_ASM3016865v1_genomic.fna	CP117818.1 Legionella pneumophila strain D5916 chromosome, complete genome
GCA_900092465.1_Lpm7613_v1_genomic.fna	LT598657.1 Legionella pneumophila strain Lpm7613 genome assembly, chromosome: 1
GCA_900119755.1_2531STDY5467379_genomic.fna	LT632615.1 Legionella pneumophila strain ST23 genome assembly, chromosome: 1
GCA_900119765.1_2532STDY5467631_genomic.fna	LT632614.1 Legionella pneumophila strain ST62 genome assembly, chromosome: 1
GCA_900119775.1_2531STDY5467446_genomic.fna	LT632616.1 Legionella pneumophila strain ST37 genome assembly, chromosome: 1
GCA_900119785.1_2531STDY5467415_genomic.fna	LT632617.1 Legionella pneumophila strain ST42 genome assembly, chromosome: 1
GCA_900186855.1_48290_H02_genomic.fna	LT906476.1 Legionella pneumophila strain NCTC11286 genome assembly, chromosome: 1
GCA_900186925.1_48450_B02_genomic.fna	LT906452.1 Legionella pneumophila strain NCTC11985 genome assembly, chromosome: 1
GCA_900475735.1_45813_H02_genomic.fna	LS483410.1 Legionella pneumophila strain NCTC11404 genome assembly, chromosome: 1
GCA_900475745.1_45532_D01_genomic.fna	LS483412.1 Legionella pneumophila subsp. pascullei strain NCTC12272 genome assembly, chromosome: 1
GCA_900635115.1_34410_A02_genomic.fna	LR133933.1 Legionella pneumophila strain NCTC12180 genome assembly, chromosome: 1
GCA_900635825.1_34347_F01_genomic.fna	LR134176.1 Legionella pneumophila strain NCTC12179 genome assembly, chromosome: 1
GCA_900636955.1_45813_E02_genomic.fna	LR134332.1 Legionella pneumophila strain NCTC11193 genome assembly, chromosome: 1
GCA_900637585.1_52067_F01_genomic.fna	LR134380.1 Legionella pneumophila subsp. pascullei strain NCTC12273 genome assembly, chromosome: 1
