# Supplementary material for: Interactions between chaperone and energy storage networks during the evolution of Legionella pneumophila under heat shock
Source: PeerJ. 2024 Apr 30;12:e17197. doi: 10.7717/peerj.17197 (PMC11067923; doi:10.7717/peerj.17197)
Supplement: Supplemental Information 5 — Table shows sampled allele frequencies at each sequenced timepoint, with bolded data showing mutations included for genetic follow-up and highlighted cell showing earliest fixation. [file peerj-12-17197-s005.xlsx]

## Sheet: HA-1
Predicted mutations
position	mutation	T1_05_output	T1_10_output	T1_15_output	T1_20_output	T1_25_output	T1_30_output	T1_35_output	T1_40_output	T1_45_output	T1_50_output	T1_55_output	T1_60_output	T1_65_output	T1_70_output	annotation	gene	description
1420	A→C	0.108	0	0	0	0	0	0	0	0	0	0	0	0	0	Y256S (TAT→TCT)	dnaA →	chromosomal replication initiation protein DnaA
20281	T→A	0	0	0	0	0	0	0.162	0	0	0	0	0	0	0	N188K (AAT→AAA)	A9F03_00075 →	multidrug transporter
49189	A→G	0	0	0	0	0.077	0	0	0	0	0	0	0	0	0	Q325Q (CAA→CAG)	A9F03_00200 →	hypothetical protein
54198	Δ1 bp	0	0	0	0	0	0	0	0	0	0	0	0.074	0	0	coding (75/213 nt)	A9F03_00230 ←	hypothetical protein
63297	T→A	0	0	0	0	0	0	0	0	0	0	0	0	0	0.055	Y224N (TAT→AAT)	A9F03_00280 →	LysR family transcriptional regulator
77713	T→A	0	0	0	0	0	0	0	0.057	0	0	0	0	0	0	R370* (AGA→TGA)	A9F03_00365 ←	aspartate aminotransferase
84315	A→G	0	0	0	0	0.071	0	0	0	0	0	0	0	0	0	F55L (TTT→CTT)	A9F03_00385 ←	FMN‑binding glutamate synthase family protein
166203	A→T	0	0	0	0	0	0	0	0.069	0	0	0	0	0	0	V256E (GTG→GAG)	A9F03_00700 ←	type I glyceraldehyde‑3‑phosphate dehydrogenase
173323	Δ37,890 bp	1	1	1	?	1	1	1	1	1	1	1	1	1	1	0	A9F03_00725–A9F03_00905	37 genes A9F03_00725, A9F03_00730, A9F03_00735, A9F03_00740, A9F03_00745, A9F03_00750, A9F03_00755, A9F03_00760, A9F03_00765, A9F03_00770, A9F03_00775, A9F03_00780, A9F03_00785, A9F03_00790, A9F03_00795, A9F03_00800, A9F03_00805, A9F03_00810, A9F03_00815, A9F03_00820, A9F03_00825, A9F03_00830, A9F03_00835, A9F03_00840, A9F03_00845, A9F03_00850, A9F03_00855, A9F03_00860, A9F03_00865, A9F03_00870, …
231553	C→A	0	0	0	0	0	0	0	0	0	0	0	0.179	0	0	V50L (GTA→TTA)	A9F03_01015 ←	secondary thiamine‑phosphate synthase enzyme
232004	C→A	0	0	0	0	0	0	0	0	0	0	0	0.077	0	0	L31L (CTC→CTA)	A9F03_01020 →	protein SapA
268901	A→T	0	0	0	0	0.061	0.25	0	0	0	0	0	0	0	0	E258V (GAG→GTG)	A9F03_01190 →	cytochrome ubiquinol oxidase subunit I
275466	A→G	0	0	0	0	0	0	0	0	0	0	0.057	0	0	0	E362G (GAA→GGA)	A9F03_01220 →	cryptochrome/photolyase family protein
280282	T→C	0	0	0	0	0	0.055	0	0	0	0	0	0	0	0	M226T (ATG→ACG)	A9F03_01235 →	hypothetical protein
281222	T→A	0	0	0	0	0.053	0	0	0	0	0	0	0	0	0	I539I (ATT→ATA)	A9F03_01235 →	hypothetical protein
303529	G→A	0	0	0	0	0	0	0	0	0	0	0.069	0	0	0	P483P (CCC→CCT)	A9F03_01340 ←	diguanylate cyclase
353526	A→C	0	0	0	0	0	0.08	0	0	0	0	0	0	0	0	D83E (GAT→GAG)	A9F03_01530 ←	magnesium transporter
357105	C→G	0	0	0	0	0	0	0.085	0	0	0	0	0	0	0	R257R (CGC→CGG)	A9F03_01545 →	nicotinate phosphoribosyltransferase
408001	G→A	0	0	0	0	0	0	0	0	0	0	0	0	0	0.235	intergenic (+48/‑44)	A9F03_01785 → / → A9F03_01790	50S ribosomal protein L7/L12/DNA‑directed RNA polymerase subunit beta
408457	G→A	0	0	0	0	0	0	0	0	0	0	0	0.486	1	1	G138E (GGG→GAG)	A9F03_01790 →	DNA‑directed RNA polymerase subunit beta
413099	C→T	0	0	0	0	0	0	0	0	0.85	0.706	0.25	0.478	0	0	A287V (GCG→GTG)	A9F03_01795 →	DNA‑directed RNA polymerase subunit beta'
514234	T→G	0	0	0	0.393	0	0	0	0	0	0	0	0	0	0	F512V (TTT→GTT)	A9F03_02360 →	hypothetical protein
530325	G→T	0	0	0	0	0	0	0	0	0	0	0	0.324	0	0	intergenic (+24/‑174)	A9F03_02440 → / → A9F03_02445	type IV secretion protein IcmD/HNH endonuclease
530337	T→A	0.191	0	0	0	0	0	0	0	0	0	0	0	0	0	intergenic (+36/‑162)	A9F03_02440 → / → A9F03_02445	type IV secretion protein IcmD/HNH endonuclease
542242	C→A	0	0	0	0	0	0	0	0	0	0	0.064	0	0	0	G392V (GGG→GTG)	A9F03_02480 ←	acetyl‑CoA carboxylase biotin carboxylase subunit
555470	C→A	0	0	0	0	0	0	0	0	0.154	0	0	0	0	0	R83L (CGA→CTA)	A9F03_02545 ←	ribosomal subunit interface protein
608041	C→T	0	0	0	0	0	0.167	0	0	0	0	0	0	0	0	P93S (CCT→TCT)	A9F03_02815 →	succinate dehydrogenase flavoprotein subunit
624307	G→A	0	0	0.652	1	0.179	0.321	0	0	0	0	0	0	0	0	intergenic (‑123/+57)	A9F03_02875 ← / ← A9F03_02880	ribose‑phosphate pyrophosphokinase/tRNA‑Gln
640129	Δ1 bp	0	0	0	0	0	1	1	1	1	1	1	1	1	1	coding (39/294 nt)	A9F03_02970 →	hypothetical protein
646052	A→G	0	0	0	0.2	0	0	0	0	0	0	0	0	0	0	intergenic (+122/‑59)	A9F03_02995 → / → A9F03_03000	tyrosine‑‑tRNA ligase/16S ribosomal RNA
646053	G→A	0	0	0	0.2	0	0	0	0	0	0	0	0	0	0	intergenic (+123/‑58)	A9F03_02995 → / → A9F03_03000	tyrosine‑‑tRNA ligase/16S ribosomal RNA
646055	T→G	0	0	0	0.2	0	0	0	0	0	0	0	0	0	0	intergenic (+125/‑56)	A9F03_02995 → / → A9F03_03000	tyrosine‑‑tRNA ligase/16S ribosomal RNA
651470	G→A	0	0	0	0	0	0	0	0	0	0.087	0	0	0	0	S115L (TCA→TTA)	A9F03_03020 ←	gamma carbonic anhydrase family protein
736655	A→G	0	0	0	0	0	0	0	0	1	0.53	0.355	0.204	0	0	L4966L (TTA→TTG)	A9F03_03355 →	hypothetical protein
736694	G→A	0	0	0	0	0	0	0	0	1	0.536	0.382	0.247	0	0	T4979T (ACG→ACA)	A9F03_03355 →	hypothetical protein
736697	G→C	0	0	0	0	0	0	0	0	1	0.536	0.382	0.25	0	0	A4980A (GCG→GCC)	A9F03_03355 →	hypothetical protein
736700	T→C	0	0	0	0	0	0	0	0	1	0.538	0.385	0.25	0	0	T4981T (ACT→ACC)	A9F03_03355 →	hypothetical protein
740647	C→A	0	0	0	0	0	0	0	0	0	0.08	0	0	0	0	T6297K (ACG→AAG)	A9F03_03355 →	hypothetical protein
777614	A→T	0	0	0	0	0	0.074	0	0	0	0	0	0	0	0	E550D (GAA→GAT)	A9F03_03525 →	glutamine‑synthetase adenylyltransferase
898975	Δ1 bp	0	0	0	0	0	0	0	0	0	0	0	?	1	1	coding (481/1074 nt)	A9F03_04005 →	acyltransferase
921544	G→A	0	0	0	0	0.076	0	0	0	0	0	0	0	0	0	S100S (TCC→TCT)	A9F03_04115 ←	quinolinate synthetase
939557	T→A	0	0	0	0	0	0	0	0	0	0	0	0	0.105	0	V135D (GTT→GAT)	A9F03_04180 →	rod shape‑determining protein MreC
939950	T→C	0	0	0	0	0	0	1	1	1	1	1	1	1	1	V266A (GTC→GCC)	A9F03_04180 →	rod shape‑determining protein MreC
1011964	T→C	0	0	0	0	0	0.071	0	0	0	0	0	0	0	0	D98G (GAT→GGT)	A9F03_04570 ←	cystathionine beta‑lyase
1017045	A→G	0	0	0	0	0.118	0	0	0	0	0	0	0	0	0	K153E (AAA→GAA)	A9F03_04585 →	hypothetical protein
1042013	G→T	0	0	0.12	0	0	0	0	0	0	0	0	0	0	0	L95F (TTG→TTT)	A9F03_04725 →	phosphatidylglycerophosphatase
1046339	A→G	0.126	0	0	0	0	0	0	0	0	0	0	0	0	0	M190V (ATG→GTG)	A9F03_04745 →	alanine dehydrogenase
1073530	C→A	0	0	0	0	0	0.091	0	0	0	0	0	0	0	0	V169F (GTT→TTT)	A9F03_04845 ←	hypothetical protein
1085844	C→A	0	0	0	0	0	0	0.112	0	0	0	0	0	0	0	D859Y (GAT→TAT)	A9F03_04895 ←	transcription‑repair coupling factor
1100439	T→G	0	0	0	0	0	0	0	0	0	0	0.276	0	0	0	L553V (TTA→GTA)	A9F03_04935 →	DNA polymerase III subunit alpha
1117789	C→A	0	0	0	0.08	0	0	0	0	0	0	0	0	0	0	intergenic (+15/+5)	A9F03_04995 → / ← A9F03_05000	hypothetical protein/hypothetical protein
1174661	A→C	0	0	0	0	0	0	0	0	0.212	0	0	0	0	0	Q289H (CAA→CAC)	A9F03_05270 →	cellobiose phosphorylase
1196355	G→A	0	0	0	0	0	0	0	0	0	0	0	0.226	0	0	A114A (GCC→GCT)	A9F03_05370 ←	hypothetical protein
1206162	C→G	0	0	0	0	0.094	0	0	0	0	0	0	0	0	0	V569V (GTC→GTG)	A9F03_05420 →	PHA synthase
1377449	T→C	0	0.222	0	0	0	0	0	0	0	0	0	0	0	0	E96G (GAG→GGG)	A9F03_06160 ←	transposase
1392187	C→T	0	0	0.092	0.118	0	0	0	0	0	0	0	0	0	0	R96C (CGC→TGC)	A9F03_06250 →	flagellar biosynthesis protein FlgD
1426358	A→T	0	0	0	0	0	0	0	0	0	0	0	0	0.221	0	S89T (TCG→ACG)	A9F03_06400 ←	hypothetical protein
1461137	T→G	0	0	0	0	0.15	0.103	0	0	0	0	0	0	0	0	F291L (TTT→TTG)	A9F03_06595 →	RNA polymerase sigma factor RpoS
1466987	G→C	0	0	0	0	0.068	0	0	0	0	0	0	0	0	0	P452A (CCT→GCT)	A9F03_06630 ←	two‑component sensor histidine kinase
1507948	T→C	0	0	0.106	0	0	0	0	0	0	0	0	0	0	0	I306M (ATA→ATG)	A9F03_06795 ←	MFS transporter
1512459	T→C	0	0	0	0	0	0	0	0.118	0	0	0	0	0	0	F85S (TTT→TCT)	A9F03_06810 →	hypothetical protein
1543950	G→A	0	0	0	0	0	0	0.125	0	0	0	0	0	0	0	V236I (GTA→ATA)	A9F03_06940 →	acetyl‑CoA acetyltransferase
1563273	C→T	0	0	0	0	0	0	0.071	0	0	0	0	0	0	0	A43V (GCC→GTC)	A9F03_07020 →	molecular chaperone HtpG
1564003	Δ28 bp	0	0.134	0.319	0	0	0	0	0	0	0	0	0	0	0	coding (858‑885/1872 nt)	A9F03_07020 →	molecular chaperone HtpG
1564424	C→T	0	0	0	0	0.217	0	0	0	0	0	0	0	0	0	Q427* (CAG→TAG)	A9F03_07020 →	molecular chaperone HtpG
1571837	Δ1 bp	0	0	0	0	0	0	0	0	0	0	0	?	1	1	coding (320/471 nt)	A9F03_07055 ←	23S rRNA (pseudouridine(1915)‑N(3))‑methyltransferase RlmH
1571956	Δ1 bp	0	0.095	0	0	0	0	0	0	0	0	0	0	0	0	coding (201/471 nt)	A9F03_07055 ←	23S rRNA (pseudouridine(1915)‑N(3))‑methyltransferase RlmH
1629368	A→T	0	0	0	0	0	0	0	0.111	0	0	0	0	0	0	Y575* (TAT→TAA)	A9F03_07335 ←	FAD‑binding protein
1634091	T→C	0	0	0	0	0	0.1	0	0	0	0	0	0	0	0	intergenic (‑95/+83)	A9F03_07355 ← / ← A9F03_07360	hypothetical protein/two‑component sensor histidine kinase
1649182	T→C	0	0	0	0	0	0	0	0	0	0	0	0.1	0	0	T103A (ACA→GCA)	A9F03_07430 ←	kinase inhibitor
1677675	C→A	0	0	0	0	0	0	0	0	0	0.08	0	0	0	0	Q174K (CAG→AAG)	A9F03_07550 →	dethiobiotin synthase
1693095	G→A	0	0	0.341	0.423	0	0.174	0	0	0	0	0	0	0	0	E671E (GAG→GAA)	A9F03_07615 →	hypothetical protein
1723259	C→A	0	0	0	0	0	0	0	0	0	0	0	0	0	0.072	T650N (ACC→AAC)	A9F03_07735 →	hypothetical protein
1744702	C→A	0	0	0	0	0	0.667	0	0	0	0	0	0	0	0	D428Y (GAT→TAT)	A9F03_07830 ←	FAD‑dependent cmnm(5)s(2)U34 oxidoreductase
1754589	G→T	0	0	0	0	0	0	0	0	0	0	0.102	0	0	0	Q100K (CAG→AAG)	A9F03_07875 ←	ribosome biogenesis GTPase Der
1784216	G→A	0	0	0	0	0	0.227	0	0	0	0	0	0	0	0	Q76Q (CAG→CAA)	A9F03_08020 →	thiamine biosynthesis protein ThiF
1797524	T→G	0	0	0	0	0	0	0.08	0	0	0	0	0	0	0	Y440S (TAT→TCT)	A9F03_08085 ←	NAD‑glutamate dehydrogenase
1819367	T→C	0	0	0	0	0	0	0	0	0	0.087	0	0	0	0	K58E (AAA→GAA)	A9F03_08200 ←	hypothetical protein
1904560	A→G	0	0	0	0	0	0	0.106	0	0	0	0	0	0	0	G22G (GGT→GGC)	A9F03_08525 ←	alpha‑amylase
1905108	G→A	0	0	0	0	0	0	0	0	0.151	0	0	0	0	0	E61K (GAA→AAA)	A9F03_08530 →	hypothetical protein
1992527	A→C	0	0	0	0	0	0	0	0	0	0	0	0	0	0.195	T189P (ACC→CCC)	A9F03_08875 →	hypothetical protein
1999290	A→G	0	0	0	0	0	0	0	0	0	0	0.077	0	0	0	R188G (AGA→GGA)	A9F03_08920 →	ATP‑dependent chaperone ClpB
2006062	A→T	0	0	0	0	0	0	0	0	0	0	0	0.1	0	0	D1154E (GAT→GAA)	A9F03_08945 ←	TIGR02099 family protein
2016243	A→G	0	0	0	0	0	0	0	0	0	0	0	0	0.143	0	Y99H (TAT→CAT)	A9F03_08980 ←	sigma‑54‑dependent Fis family transcriptional regulator
2029649	A→T	0	0	0	0	0.091	0	0	0	0	0	0	0	0	0	D385V (GAC→GTC)	A9F03_09040 →	ribonucleoside‑diphosphate reductase subunit alpha
2067175	G→C	0	0	0	0	0	0	0.094	0	0	0	0	0	0	0	W190S (TGG→TCG)	A9F03_09215 →	DUF490 domain‑containing protein
2086224	C→A	0	0	0	0	0	0	0	0	0	0	0	0	0	0.125	Q123H (CAG→CAT)	A9F03_09275 ←	lipid A export permease/ATP‑binding protein MsbA
2103740	G→T	0	0	0	0	0	0	0.111	0	0	0	0	0	0	0	intergenic (+4/‑9)	A9F03_09350 → / → A9F03_09355	methionine ABC transporter permease/hypothetical protein
2107437	A→G	0	0	0	0	0	0	0	0	0	0	0	0	0	0.087	L115L (TTA→CTA)	A9F03_09370 ←	D‑glycero‑beta‑D‑manno‑heptose‑1,7‑bisphosphate 7‑phosphatase
2109633	A→G	0	0	0	0	0	0	0	0	0	0	0.064	0	0	0	G73G (GGT→GGC)	A9F03_09375 ←	glycine‑‑tRNA ligase subunit beta
2112473	T→A	0	0	0	0	0	0	0	0	0	0.071	0	0	0	0	H556L (CAC→CTC)	A9F03_09390 ←	DNA helicase II
2131729	C→G	0	0	0	0	0	0	0	0	0	0.292	0.647	0.769	1	1	G202A (GGA→GCA)	A9F03_09480 ←	ATP‑dependent protease ATP‑binding subunit ClpX
2142102	G→A	0	0	0	0	0.065	0	0	0	0	0	0	0	0	0	A68V (GCG→GTG)	A9F03_09540 ←	elongation factor 4
2203556	A→G	0	0	0	0	0	0	0	0	0.132	0	0	0	0	0	Q193R (CAG→CGG)	A9F03_09830 →	serine kinase
2221641	A→G	0	0	0	0	0	0	0	0	0	0	0	0	0	0.136	I163T (ATT→ACT)	A9F03_09905 ←	3',5'‑cyclic‑nucleotide phosphodiesterase
2287823	T→C	0	0	0	0	0	0	0	0	0	0	0	0	0.179	0	I202V (ATT→GTT)	A9F03_10190 ←	protein‑export membrane protein SecF
2289762	A→G	0	0	0	0	0	0	0	0	0.128	0	0	0	0	0	R178R (CGT→CGC)	A9F03_10195 ←	protein‑export membrane protein SecD
2304498	A→G	0	0	0	0	0	0	0	0.083	0	0	0	0	0	0	intergenic (+339/‑6)	A9F03_10270 → / → A9F03_10275	pyrroline‑5‑carboxylate reductase/YggT family protein
2307877	Δ1 bp	0	0	0	0	0	0	0	0	0	0	0.124	0	0	0	coding (1/1689 nt)	A9F03_10290 ←	serine metalloprotease
2313188	G→A	0	0	0	0	0	0.241	0	0	0	0	0	0	0	0	P334L (CCG→CTG)	A9F03_10315 ←	molecular chaperone DnaJ
2313905	A→T	0	0	0	0	0	0	1	1	1	1	1	1	1	1	F95Y (TTT→TAT)	A9F03_10315 ←	molecular chaperone DnaJ
2315691	C→T	0	0	0	0	0.762	0.758	0	0	0	0	0	0	0	0	A208T (GCC→ACC)	A9F03_10320 ←	molecular chaperone DnaK
2316031	C→T	0	0	0.708	1	1	1	1	1	1	1	1	1	1	1	M94I (ATG→ATA)	A9F03_10320 ←	molecular chaperone DnaK
2316890	A→G	0	0	0.083	0	0	0	0	0	0	0	0	0	0	0	L56S (TTG→TCG)	A9F03_10325 ←	nucleotide exchange factor GrpE
2345128	A→G	0	0	0	0	0	0.154	0	0	0	0	0	0	0	0	noncoding (74/77 nt)	A9F03_10475 →	tRNA‑Arg
2377863	G→A	0	0	0	0	0	0	0.256	0	0	0	0	0	0	0	A239V (GCT→GTT)	A9F03_10605 ←	conjugal transfer protein TraG
2379784	A→G	0	0	0.155	0	0	0	0	0	0	0	0	0	0	0	A62A (GCT→GCC)	A9F03_10610 ←	conjugal transfer protein TraH
2386868	C→T	0	0.062	0	0	0	0	0	0	0	0	0	0	0	0	A420T (GCT→ACT)	A9F03_10650 ←	type‑IV secretion system protein TraC
2437322	C→A	0	0	0	0	0	0	0	0	0	0	0	0	0	0.101	V245V (GTC→GTA)	A9F03_10915 →	sugar dehydrogenase
2468466	G→C	0.097	0	0	0	0	0	0	0	0	0	0	0	0	0	L1165L (CTG→CTC)	A9F03_10995 →	septation initiation protein
2489050	A→C	0	0	0	0	0	0	0	0	0	0	0	0	0.185	0	S576R (AGT→AGG)	A9F03_11090 ←	aspartate aminotransferase family protein
2533284	T→A	0	0	0	0	0	0	0	0	0.1	0	0	0	0	0	I24L (ATA→TTA)	A9F03_11210 ←	protein archease
2616894	C→T	0	0	0	0.125	0	0	0	0	0	0	0	0	0	0	S179S (TCC→TCT)	A9F03_11545 →	hypothetical protein
2632957	A→G	0	0	0	0.14	0	0	0	0	0	0	0	0	0	0	N191S (AAT→AGT)	A9F03_11625 →	asparagine‑‑tRNA ligase
2634400	T→G	0	0	0	0	0	0.084	0	0	0	0	0	0	0	0	P164P (CCA→CCC)	A9F03_11635 ←	lipoprotein releasing system, ATP‑binding protein
2653038	C→T	0	0	0	0	0	0.233	0	0	0	0	0	0	0	0	intergenic (‑58/+52)	A9F03_11715 ← / ← A9F03_11720	aspartate‑semialdehyde dehydrogenase/chorismate synthase
2704178	Δ1 bp	0	0	0	0	0	0	1	1	1	1	1	1	1	1	coding (368/852 nt)	A9F03_11970 →	hypothetical protein
2731039	A→G	0.25	0	0	0	0	0	0	0	0	0	0	0	0	0	intergenic (+218/‑223)	A9F03_12110 → / → A9F03_12115	LysR family transcriptional regulator/transcriptional regulator
2731055	C→T	0	0	0	0	0	0	0	0	0	0	0	0	0	0.276	intergenic (+234/‑207)	A9F03_12110 → / → A9F03_12115	LysR family transcriptional regulator/transcriptional regulator
2779311	C→T	0	0	0	0	0	0	0	0	0	0	0	0	0	0.077	P302L (CCT→CTT)	A9F03_12320 →	penicillin‑binding protein
2790164	T→C	0	0	0	0	0	0	0	0	0.133	0	0	0	0	0	intergenic (‑50/‑239)	A9F03_12355 ← / → A9F03_12360	hypothetical protein/malonate decarboxylase subunit alpha
2838635	C→T	0	0	0	0	0	0	0	0	0	0	0	0	0.219	0	E162K (GAG→AAG)	A9F03_12615 ←	hydrogenase accessory protein HypB
2839934	G→C	0	0	0	0	0	0	0	0	0	0.073	0	0	0	0	A72G (GCG→GGG)	A9F03_12625 ←	DNA repair protein
2929730	C→A	0	0	0	0	0	0	0	0	0	0	0	0	0	0.077	intergenic (‑20/+46)	A9F03_13010 ← / ← A9F03_13015	hypothetical protein/AraC family transcriptional regulator
2930332	T→A	0	0	0	0	0	0	0	0	0	0	0	0.149	0	0	N66I (AAT→ATT)	A9F03_13015 ←	AraC family transcriptional regulator
2964451	G→A	0	0	0.448	1	0.149	0.2	0	0	0	0	0	0	0	0	D29N (GAT→AAT)	A9F03_13200 →	D‑alanyl‑D‑alanine dipeptidase
3020892	C→T	0	0	0	0	0	0	0	0	0	0	0	0	0	0.08	Q47* (CAG→TAG)	A9F03_13430 →	leucyl aminopeptidase
3038974	T→C	0	0	0	0	0.337	0	0	0	0	0	0	0	0	0	S113P (TCA→CCA)	A9F03_13495 →	hypothetical protein
3039213	T→A	0	0	0.202	0	0	0	0.157	0	0	0	0	0	0	0	G192G (GGT→GGA)	A9F03_13495 →	hypothetical protein
3039222	A→G	0	0	0	0	0	0	0	0	0	0.176	0	0	0	0	G195G (GGA→GGG)	A9F03_13495 →	hypothetical protein
3039348	T→A	0	0	0	0	0.314	0.344	0	0.412	0	0	0.164	0	0.322	0	G237G (GGT→GGA)	A9F03_13495 →	hypothetical protein
3039429	A→C	0	0	0	0	0.067	0	0	0	0	0	0	0	0	0	G264G (GGA→GGC)	A9F03_13495 →	hypothetical protein
3039450	G→A	0	0	0	0	0.099	0	0	0	0	0	0	0	0	0	E271E (GAG→GAA)	A9F03_13495 →	hypothetical protein
3042468	A→C	1	1	1	1	1	1	1	1	1	1	1	1	1	1	L68R (CTT→CGT)	sirA ←	two‑component system response regulator UvrY
3065432	C→T	0	0	0	0	0	0	0	0	0	0.083	0	0	0	0	G281R (GGG→AGG)	A9F03_13630 ←	signal recognition particle‑docking protein FtsY
3067679	T→A	0	0	0	0	0	0.062	0	0	0	0	0	0	0	0	I8N (ATC→AAC)	A9F03_13640 →	peptidase M16
3073672	A→G	0	0	0	0	0	0	0	0	0	0	0.087	0	0	0	H499R (CAT→CGT)	A9F03_13665 →	bifunctional metallophosphatase/5'‑nucleotidase
3103597	G→A	0	0	0	0	0	0.164	0	0	0	0	0	0	0	0	Q193* (CAA→TAA)	sspA ←	stringent starvation protein A
3103679	T→A	0	0	0	0	0	0.298	0	0	0	0	0	0	0	0	L165F (TTA→TTT)	sspA ←	stringent starvation protein A
3113540	C→T	0	0	0	0	0	0	0	0.067	0	0	0	0	0	0	G131S (GGT→AGT)	A9F03_13855 ←	translation initiation factor IF‑3
3124446	A→T	0	0	0	0	0	0	0	0.105	0	0	0	0	0	0	S58S (TCT→TCA)	A9F03_13920 ←	transcriptional regulator
3144420	T→A	0	0	0	0	0	0	0	0	0	0	0.374	0	0	0	L458F (TTA→TTT)	A9F03_14025 ←	hypothetical protein
3198264	C→T	0	0	0	0	0	0	0	0	0	0	0	0.071	0	0	A296T (GCG→ACG)	hflB ←	ATP‑dependent metalloprotease
3238566	C→G	0	0	0	0	0	0	0	0	0	0	0	0	0	0.111	E419Q (GAA→CAA)	A9F03_14410 ←	hypothetical protein
3255113	T→A	0	0	0	0	0	0	0	0	0	0	0.077	0	0	0	Q534L (CAA→CTA)	A9F03_14450 ←	RNA‑binding transcriptional accessory protein
3261144	A→G	0	0	0	0	0	0	0	0.077	0	0	0	0	0	0	intergenic (‑166/‑87)	A9F03_14465 ← / → A9F03_14470	phospholipase/hypothetical protein
3267288	A→G	0	0	0	?	0	0	0	0	0	0.27	0	0	0	0	S268S (AGT→AGC)	A9F03_14500 ←	hypothetical protein
3279384	C→T	0.239	0	0.225	0	0.301	0	0.205	0	0	0.324	0	0	0	0	Q203Q (CAG→CAA)	A9F03_14550 ←	hypothetical protein
3279389	T→C	0	0	0	0	0	0	0	0	0.218	0	0	0	0	0	N202D (AAT→GAT)	A9F03_14550 ←	hypothetical protein
3279416	T→G	0	0	0	0	0	0.164	0	0	0	0	0	0	0	0	K193Q (AAG→CAG)	A9F03_14550 ←	hypothetical protein
3279417	G→A	0	0	0	0	0	0.172	0	0	0	0	0	0	0	0	D192D (GAC→GAT)	A9F03_14550 ←	hypothetical protein
3279472	C→T	0	0.311	0.194	0.221	0.256	0.117	0	0	0	0.279	0	0.14	0	0	R174Q (CGG→CAG)	A9F03_14550 ←	hypothetical protein
3296805	C→T	0	0	0	0	0	0	0	0	0	0	0.071	0	0	0	A557T (GCC→ACC)	A9F03_14640 ←	phosphoenolpyruvate‑‑protein phosphotransferase
3297663	C→T	0	0	0.621	1	0	0.188	0	0	0	0	0	0	0	0	E271K (GAA→AAA)	A9F03_14640 ←	phosphoenolpyruvate‑‑protein phosphotransferase
3334791	C→T	0	0	0	0.087	0	0	0	0	0	0	0	0	0	0	Q106* (CAA→TAA)	A9F03_14810 →	hypothetical protein
3355456	T→A	0	0	0	0	0	0.051	0	0	0	0	0	0	0	0	D50E (GAT→GAA)	A9F03_14910 →	DNA polymerase subunit beta
3383485	A→T	0	0	0	0	0	0	0	0	0	0.077	0	0	0	0	Y69* (TAT→TAA)	A9F03_15050 ←	hypothetical protein
3427949	G→A	0	0	0	0.143	0	0	0	0	0	0	0	0	0	0	R175C (CGC→TGC)	A9F03_15250 ←	F0F1 ATP synthase subunit alpha
3428887	C→A	0	0	0	0	0	0	0	0.08	0	0	0	0	0	0	A49S (GCT→TCT)	A9F03_15255 ←	F0F1 ATP synthase subunit delta
3445372	G→A	0	0	0	0	0	0	0	0	0.154	0	0	0	0	0	T302M (ACG→ATG)	A9F03_15340 ←	membrane protein insertase YidC
