# Supplementary material for: Interactions between chaperone and energy storage networks during the evolution of Legionella pneumophila under heat shock
Source: PeerJ. 2024 Apr 30;12:e17197. doi: 10.7717/peerj.17197 (PMC11067923; doi:10.7717/peerj.17197)
Supplement: Supplemental Information 6 — Table shows sampled allele frequencies at each sequenced timepoint, with bolded data showing mutations included for genetic follow-up and highlighted cell showing earliest fixation. [file peerj-12-17197-s006.xlsx]

## Sheet: HA-2
Predicted mutations
position	mutation	T2_05_output	T2_10_output	T2_15_output	T2_20_output	T2_25_output	T2_30_output	T2_35_output	T2_40_output	T2_45_output	T2_50_output	T2_55_output	T2_60_output	T2_65_output	T2_70_output	annotation	gene	description
36212	G→C	0	0	0	0	0	0	0	0	0.083	0	0	0	0	0	G397R (GGC→CGC)	A9F03_00145 →	GGDEF domain‑containing protein
101537	T→A	0	0.1	0	0	0	0	0	0	0	0	0	0	0	0	L617I (TTA→ATA)	A9F03_00465 →	hypothetical protein
125832	C→T	0	0	0	0.054	0	0	0	0	0	0	0	0	0	0	H597Y (CAT→TAT)	A9F03_00560 →	hypothetical protein
131527	A→T	0	0	0	0	0	0	0	0	0	0	0	0	0.1	0	L164* (TTA→TAA)	A9F03_00575 ←	histidine kinase
160497	T→A	0	0	0	0.051	0	0	0	0	0	0	0	0	0	0	S917S (TCA→TCT)	A9F03_00685 ←	SdhB
162566	T→A	0	0.069	0	0	0	0	0	0	0	0	0	0	0	0	S228C (AGC→TGC)	A9F03_00685 ←	SdhB
172073	G→C	0	0	0	0	0	0	0	0	0	0	0	0.154	0	0	K442N (AAG→AAC)	A9F03_00715 →	oligopeptidase A
173323	Δ37,890 bp	1	1	1	1	1	1	1	?	1	1	1	1	1	1	0	A9F03_00725–A9F03_00905	37 genes A9F03_00725, A9F03_00730, A9F03_00735, A9F03_00740, A9F03_00745, A9F03_00750, A9F03_00755, A9F03_00760, A9F03_00765, A9F03_00770, A9F03_00775, A9F03_00780, A9F03_00785, A9F03_00790, A9F03_00795, A9F03_00800, A9F03_00805, A9F03_00810, A9F03_00815, A9F03_00820, A9F03_00825, A9F03_00830, A9F03_00835, A9F03_00840, A9F03_00845, A9F03_00850, A9F03_00855, A9F03_00860, A9F03_00865, A9F03_00870, …
246774	A→G	0	0	0	0	0.074	0	0	0	0	0	0	0	0	0	D2G (GAT→GGT)	A9F03_01100 →	methyltransferase
265347	A→C	0	0.194	0	0	0	0	0	0	0	0	0	0	0	0	D277E (GAT→GAG)	A9F03_01175 ←	hypothetical protein
300681	C→G	0	0	0	0	0	0	0	0.105	0	0	0	0	0	0	L325F (TTG→TTC)	A9F03_01330 ←	amino acid permease
305410	A→G	0	0	0	0	0	0	0	0	0	0	0	0.059	0	0	L758P (CTT→CCT)	A9F03_01345 ←	HAD family hydrolase
320808	A→T	0	0	0	0	0	0	0	0.064	0	0	0	0	0	0	D116V (GAT→GTT)	A9F03_01385 →	4‑aminobutyrate transaminase
328835	G→C	0	0	0	0	0	0	0	0	0	0.205	0	0	0	0	G623G (GGC→GGG)	A9F03_01415 ←	NAD‑glutamate dehydrogenase
344220	G→A	0	0	0	0	0	0	0	0	0.111	0	0	0	0	0	E584K (GAA→AAA)	A9F03_01480 →	hypothetical protein
405338	C→G	0	0	0	0	0	0	0	0	0	0	0	0.061	0	0	P101A (CCG→GCG)	A9F03_01765 →	transcription termination/antitermination protein NusG
427225	A→G	0	0	0	0	0.061	0	0	0	0	0	0	0	0	0	S43G (AGT→GGT)	A9F03_01890 →	30S ribosomal protein S14
441851	A→G	0	0	0	0	0	0	0	0	0	0.054	0	0	0	0	T245T (ACA→ACG)	A9F03_01990 →	lipid A biosynthesis acyltransferase
442463	T→A	0	0	0	0.077	0	0	0	0	0	0	0	0	0	0	intergenic (‑86/+89)	A9F03_01995 ← / ← A9F03_02000	PilZ domain‑containing protein/type IV secretion protein Dot
452430	C→T	0	0	0	0	0	0	0	0	0	0	0.12	0	0	0	Q134* (CAA→TAA)	A9F03_02050 →	RNA‑binding protein
499290	Δ1 bp	0	0.105	0	0	0	0	0	0	0	0	0	0	0	0	coding (485/1422 nt)	A9F03_02280 →	MFS transporter
503963	A→G	0	0	0	0	0	0	0	0	0	0	0	0	0	0.091	V53V (GTT→GTC)	A9F03_02305 ←	cold shock domain protein CspD
514122	A→G	0	0	0	0	0	0	0	0	0	0.143	0	0	0	0	G474G (GGA→GGG)	A9F03_02360 →	hypothetical protein
514144	G→T	0	0.317	0	0	0	0	0	0	0	0	0	0	0	0	V482F (GTC→TTC)	A9F03_02360 →	hypothetical protein
514198	A→C	0	0.258	0	0	0	0	0	0	0	0	0	0	0	0	T500P (ACT→CCT)	A9F03_02360 →	hypothetical protein
607433	C→G	0	0	0	0	0	0.118	0	0	0	0	0	0	0	0	T6T (ACC→ACG)	A9F03_02810 →	succinate dehydrogenase, hydrophobic membrane anchor protein
636242	G→A	0	0	0	0.077	0	0	0	0	0	0	0	0	0	0	G149E (GGG→GAG)	A9F03_02945 →	acyl‑CoA desaturase
640129	Δ1 bp	0	0	0	1	1	1	1	1	1	1	1	1	1	1	coding (39/294 nt)	A9F03_02970 →	hypothetical protein
640237	A→G	0.133	0	0	0	0	0	0	0	0	0	0	0	0	0	E49E (GAA→GAG)	A9F03_02970 →	hypothetical protein
687086	A→C	0	0	0	0	0	0.085	0	0	0	0	0	0	0	0	T8P (ACT→CCT)	A9F03_03215 →	NADPH‑dependent 7‑cyano‑7‑deazaguanine reductase QueF
766391	G→T	0	0	0	0	0	0	0	0	0	0	0	0	0	0.118	P70P (CCC→CCA)	A9F03_03475 ←	hypothetical protein
772247	C→A	0	0	0	0	0	0	0	0	0.081	0	0	0	0	0	R282S (CGC→AGC)	A9F03_03500 →	adenylate cyclase
817441	T→C	0	0	0	0	0	0	0	0	0	0	0.18	0	0	0	I489T (ATC→ACC)	A9F03_03645 →	energy‑dependent translational throttle protein EttA
837860	A→C	0	0	0	0	0	0	0	0	0.095	0	0	0	0	0	D257E (GAT→GAG)	A9F03_03730 ←	multidrug efflux protein
939950	T→C	0	0	0	1	1	1	1	1	1	1	1	1	1	1	V266A (GTC→GCC)	A9F03_04180 →	rod shape‑determining protein MreC
967176	T→C	0	0	0	0	0	0	0	0	0	0	0	0	0.061	0	Q88R (CAG→CGG)	A9F03_04320 ←	D‑arabinose 5‑phosphate isomerase
1029764	C→T	0	0	0.118	0	0	0	0	0	0	0	0	0	0	0	A174V (GCT→GTT)	A9F03_04655 →	3‑hydroxyacyl‑CoA dehydrogenase
1039286	A→G	0	0.08	0	0	0	0	0	0	0	0	0	0	0	0	Q340Q (CAA→CAG)	A9F03_04710 →	UDP‑N‑acetylmuramoyl‑L‑alanyl‑D‑glutamate‑‑2, 6‑diaminopimelate ligase
1066396	G→A	0	0	0	0	0	0.111	0	0	0	0	0	0	0	0	Q405* (CAA→TAA)	A9F03_04825 ←	LidA
1066468	G→A	0	0	0	0	0	0.333	0	0	0	0	0	0	0	0	Q381* (CAA→TAA)	A9F03_04825 ←	LidA
1070782	T→A	0	0	0	0	0	0	0	0	0	0	0	0.091	0	0	H65L (CAC→CTC)	A9F03_04830 ←	hypothetical protein
1095948	A→G	0	0	0	0.091	0	0	0	0	0	0	0	0	0	0	N581D (AAT→GAT)	A9F03_04920 →	peptide ABC transporter substrate‑binding protein
1096777	T→A	0	0	0	0	0	0.091	0	0	0	0	0	0	0	0	R139R (CGT→CGA)	A9F03_04925 →	peptide ABC transporter permease
1097486	G→A	0	0	0	0	0	0	0	0.309	0	0	0	0	0	0	R42K (AGG→AAG)	A9F03_04930 →	peptide ABC transporter permease
1108432	C→T	0	0	0	0	0	0	0	0.067	0	0	0	0	0	0	R159H (CGT→CAT)	A9F03_04960 ←	hypothetical protein
1152289	G→A	0	0	0	0	0.071	0	0	0	0	0	0	0	0	0	M128I (ATG→ATA)	A9F03_05185 →	ATPase
1172553	T→C	0	0	0	0	0	0	0	0	0	0	0	0	0	0.056	L59S (TTG→TCG)	A9F03_05260 →	GGDEF domain‑containing protein
1285208	T→G	0.073	0	0	0	0	0	0	0	0	0	0	0	0	0	intergenic (+81/‑232)	A9F03_05765 → / → A9F03_05770	amino acid ABC transporter substrate‑binding protein/hypothetical protein
1345427	G→A	0	0	0	0	0	0	0	0	0	0	0	0	0	0.15	A309A (GCG→GCA)	A9F03_06015 →	two‑component sensor histidine kinase
1352149	C→A	0	0	0	0	0.298	0	0	0	0	0	0	0	0	0	T305N (ACC→AAC)	A9F03_06040 →	riboflavin biosynthesis protein RibD
1362259	G→T	0.111	0	0	0	0	0	0	0	0	0	0	0	0	0	A54S (GCT→TCT)	A9F03_06085 →	outer membrane protein assembly factor BamD
1377428	T→A	0	0	0	0	0.223	0	0	0	0	0	0	0	0	0	L5F (TTA→TTT)	A9F03_06155 ←	ATP phosphoribosyltransferase
1381898	G→A	0	0	0	0	0	0	0	0	0.111	0	0	0	0	0	intergenic (‑245/‑4)	A9F03_06180 ← / → A9F03_06185	orotate phosphoribosyltransferase/DNA‑binding protein
1408084	A→G	0	0	0	0	0	0	0	0	0.09	0	0	0	0	0	D26G (GAT→GGT)	A9F03_06325 →	DNA polymerase V, subunit C
1408291	A→G	0	0	0	0	0	0	0	0.08	0	0	0	0	0	0	E95G (GAA→GGA)	A9F03_06325 →	DNA polymerase V, subunit C
1564003	Δ28 bp	0	0.213	0.389	0	0	0	0	0	0	0	0	0	0	0	coding (858‑885/1872 nt)	A9F03_07020 →	molecular chaperone HtpG
1565393	T→C	0.137	0	0	0	0	0	0	0	0	0	0	0	0	0	Q11Q (CAA→CAG)	A9F03_07025 ←	Fis family transcriptional regulator
1569336	G→T	0	0	0	0	0	0	0	0	0	0	0	0	0.28	1	R112S (CGT→AGT)	A9F03_07045 ←	rod shape‑determining protein RodA
1574162	T→A	0	0	0	0	0	0.36	0	0	0	0	0	0	0	0	intergenic (‑112/‑111)	A9F03_07065 ← / → A9F03_07070	MFS transporter/urocanate hydratase
1609686	C→T	0	0	0.095	0	0	0	0	0	0	0	0	0	0	0	W393* (TGG→TAG)	A9F03_07250 ←	citrate (Si)‑synthase
1646376	T→C	0	0	0	0	0	0	0	0	0	0	0	0.062	0	0	Y391H (TAC→CAC)	A9F03_07420 →	hypothetical protein
1739635	A→G	0	0	0.113	0	0	0	0	0	0	0	0	0	0	0	K80E (AAA→GAA)	A9F03_07810 →	phosphoenolpyruvate synthase regulatory protein
1743853	T→C	0	0	0	0.066	0	0	0	0	0	0	0	0	0	0	K15K (AAA→AAG)	A9F03_07825 ←	isomerase
1762263	T→A	0	0	0	0	0.091	0	0	0	0	0	0	0	0	0	N13K (AAT→AAA)	A9F03_07920 →	tRNA hydroxylase
1762819	C→T	0	0	0	0.152	0	0	0	0	0	0	0	0	0	0	R199C (CGC→TGC)	A9F03_07920 →	tRNA hydroxylase
1,765,254:1	+A	0	0.1	0	0	0	0	0	0	0	0	0	0	0	0	coding (83/1710 nt)	A9F03_07940 →	long‑chain‑fatty‑acid‑‑CoA ligase
1766014	G→T	0	0	0	0	0	0	0	0	0	0	0.222	0.381	0	0	L281L (CTG→CTT)	A9F03_07940 →	long‑chain‑fatty‑acid‑‑CoA ligase
1813664	A→G	0	0	0	0	0	0	0	0	0	0.083	0	0	0	0	intergenic (‑56/+107)	A9F03_08165 ← / ← A9F03_08170	acetyl‑CoA acetyltransferase/hypothetical protein
1814421	C→A	0	0	0	0	0	0	0	0	0	0	0	0	0	0.1	D138Y (GAT→TAT)	A9F03_08170 ←	hypothetical protein
1835849	C→T	0	0	0	0	0	0	0	0	0	0	0	0	0	0.083	V468V (GTG→GTA)	A9F03_08270 ←	cell division protein FtsI
1869370	Δ1 bp	0	0	0	0	0	0	0	0	1	1	1	1	1	1	intergenic (‑26/+2)	A9F03_08410 ← / ← A9F03_08415	hypothetical protein/signal peptidase
1917400	Δ1 bp	0	0	0	0	0	0	0	0	0	0.071	0	0	0	0	coding (521/714 nt)	A9F03_08575 ←	hypothetical protein
2004775	C→T	0	0	0	0.054	0	0	0	0	0	0	0	0	0	0	E85K (GAG→AAG)	A9F03_08935 ←	UDP‑N‑acetylmuramate:L‑alanyl‑gamma‑D‑glutamyl‑ meso‑diaminopimelate ligase
2068379	T→G	0	0	0	0	0	0.119	0	0	0	0	0	0	0	0	G591G (GGT→GGG)	A9F03_09215 →	DUF490 domain‑containing protein
2119856	C→A	0	0	0	0.246	0	0	0	0	0	0	0	0	0	0	P123T (CCG→ACG)	A9F03_09420 →	multidrug ABC transporter permease
2128289	A→G	0	0	0	0	0	0.1	0	0	0	0	0	0	0	0	intergenic (‑47/+82)	A9F03_09470 ← / ← A9F03_09475	DNA‑binding protein/endopeptidase La
2131724	C→T	0	0	0	0	0	0	0	0.095	0	0	0	0	0	0	G204S (GGT→AGT)	A9F03_09480 ←	ATP‑dependent protease ATP‑binding subunit ClpX
2131725	T→G	0	0	0	0	0	0	0	0	1	1	1	1	1	1	E203D (GAA→GAC)	A9F03_09480 ←	ATP‑dependent protease ATP‑binding subunit ClpX
2138608	G→A	0	0	0	0	0	0	0	0	0	0	0	0	0.208	0.864	T203I (ACA→ATA)	A9F03_09525 ←	ribonuclease III
2168704	A→C	0	0	0	0	0	0	0	0.144	0	0	0	0	0	0	Y582S (TAC→TCC)	A9F03_09680 →	transglutaminase
2285854	T→C	0	0	0	0	0	0.091	0	0	0	0	0	0	0	0	S2S (TCT→TCC)	A9F03_10180 →	histidinol‑phosphate transaminase
2305883	G→A	0	0	0	0	0	0	0	0	0	0	0	0	0	0.1	W43* (TGG→TGA)	A9F03_10285 →	hypothetical protein
2307802	C→T	0	0	0	0	0.267	0	0	0	0	0	0	0	0	0	E26K (GAA→AAA)	A9F03_10290 ←	serine metalloprotease
2313905	A→T	0	0	0	0	0.25	0.455	1	1	1	1	1	1	1	1	F95Y (TTT→TAT)	A9F03_10315 ←	molecular chaperone DnaJ
2314110	T→A	0	0	0	0	0.727	0.65	0	0	0	0	0	0	0	0	R27W (AGG→TGG)	A9F03_10315 ←	molecular chaperone DnaJ
2315196	C→G	0	0	0	0	0	0	0	0	0	0	0.632	0.6	0.692	1	V373L (GTA→CTA)	A9F03_10320 ←	molecular chaperone DnaK
2316031	C→T	0	0	0	1	1	1	1	1	1	1	1	1	1	1	M94I (ATG→ATA)	A9F03_10320 ←	molecular chaperone DnaK
2528933	T→C	0	0	0.071	0	0	0	0	0	0	0	0	0	0	0	V110V (GTT→GTC)	A9F03_11190 →	MFS transporter
2539888	T→C	0.1	0	0	0	0	0	0	0	0	0	0	0	0	0	N31D (AAT→GAT)	A9F03_11235 ←	hypothetical protein
2577413	T→G	0	0	0	0	0	0	0	0.077	0	0	0	0	0	0	F247L (TTT→TTG)	A9F03_11390 →	nitric oxide reductase
2587006	T→C	0	0	0	0.074	0	0	0	0	0	0	0	0	0	0	F376L (TTT→CTT)	A9F03_11410 →	peptidase S9
2608082	A→G	0	0	0	0	0	0	0	0	0	0.067	0	0	0	0	F78S (TTT→TCT)	A9F03_11495 ←	MBL fold metallo‑hydrolase
2634539	G→C	0	0.281	0	0	0	0	0	0	0	0	0	0	0	0	A118G (GCT→GGT)	A9F03_11635 ←	lipoprotein releasing system, ATP‑binding protein
2666132	A→C	0	0.1	0	0	0	0	0	0	0	0	0	0	0	0	intergenic (+256/‑22)	A9F03_11785 → / → A9F03_11790	hypothetical protein/3‑hydroxybutyrate dehydrogenase
2700851	A→G	0	0	0	0	0	0	0	0	0	0	0.087	0	0	0	L283L (TTA→CTA)	fadH ←	NADPH‑dependent 2,4‑dienoyl‑CoA reductase
2704178	Δ1 bp	0	0	0	0	0	0	1	1	1	1	1	1	1	1	coding (368/852 nt)	A9F03_11970 →	hypothetical protein
2704185	Δ1 bp	0	0	0	0	0	0.095	0.094	0	0	0	0	0	0	0	coding (375/852 nt)	A9F03_11970 →	hypothetical protein
2,704,266:1	+T	0	0	0	0	0	0	0.091	0	0	0	0	0	0	0	coding (456/852 nt)	A9F03_11970 →	hypothetical protein
2720666	G→T	0	0	0	0	0.064	0	0	0	0	0	0	0	0	0	S97Y (TCC→TAC)	A9F03_12045 ←	hypothetical protein
2721993	G→A	0	0	0	0	0.334	0	0	0	0	0	0	0	0	0	intergenic (‑697/‑136)	A9F03_12050 ← / → A9F03_12055	DNA‑binding protein/transcriptional regulator
2767179	C→T	0	0	0.117	0	0	0	0	0	0	0	0	0	0	0	intergenic (+123/+72)	A9F03_12260 → / ← A9F03_12265	hypothetical protein/type IV secretion protein Dot
2778396	T→C	0	0	0	0	0	0	0	0	0	0	0.125	0	0	0	intergenic (+2/‑11)	A9F03_12315 → / → A9F03_12320	hypothetical protein/penicillin‑binding protein
2813076	G→C	0	0	0	0.105	0	0	0	0	0	0	0	0	0	0	P666R (CCA→CGA)	A9F03_12495 ←	hypothetical protein
2838639	C→T	0	0	0	0	0	0	0	0	0	0.385	0	0	0	0	L160L (CTG→CTA)	A9F03_12615 ←	hydrogenase accessory protein HypB
2887292	A→T	0	0	0	0	0	0	0	0	0.087	0	0	0	0	0	L500* (TTA→TAA)	A9F03_12820 ←	transporter
2891374	C→A	0	0	0	0	0	0	0	0	0	0	0	0.059	0	0	D64Y (GAT→TAT)	A9F03_12830 ←	transporter
2919572	A→G	0	0	0	0	0	0	0	0.083	0	0	0	0	0	0	intergenic (‑151/+500)	A9F03_12955 ← / ← A9F03_12960	hypothetical protein/hypothetical protein
2956659	G→C	0	0	0	0	0	0	0.243	0	0	0	0	0	0	0	G193G (GGC→GGG)	A9F03_13170 ←	acyl‑CoA dehydrogenase
2959028	A→T	0	0	0	0	0	0	0	0	0.217	0	0	0	0	0	L142* (TTA→TAA)	A9F03_13175 ←	MFS transporter
2971845	T→C	0	0	0	0	0	0	0	0	0	0	0	0.053	0	0	E26G (GAG→GGG)	A9F03_13220 ←	D‑alanyl‑D‑alanine carboxypeptidase/D‑alanyl‑D‑alanine‑endopeptidase
2974730	C→T	0	0	0	0.055	0	0	0	0	0	0	0	0	0	0	L297L (TTG→TTA)	A9F03_13240 ←	16S rRNA (cytosine(967)‑C(5))‑methyltransferase
3026178	C→A	0	0	0	0	0	0	0	0	0	0.083	0	0	0	0	intergenic (‑139/‑219)	A9F03_13450 ← / → A9F03_13455	murein biosynthesis integral membrane protein MurJ/30S ribosomal protein S20
3033670	T→A	0	0	0	0	0	0	0	0	0	0	0.1	0	0	0	S3S (TCA→TCT)	A9F03_13470 ←	endopeptidase IV
3038916	G→A	0	0	0	0	0	0	0	0	0	0	0	0.083	0	0	G93G (GGG→GGA)	A9F03_13495 →	hypothetical protein
3038974	T→C	0	0	0	0	0	0	0	0.149	0	0	0	0	0	0	S113P (TCA→CCA)	A9F03_13495 →	hypothetical protein
3039213	T→A	0	0	0	0	0	0	0.295	0	0	0	0	0.17	0	0	G192G (GGT→GGA)	A9F03_13495 →	hypothetical protein
3039222	A→G	0	0	0	0	0	0	0	0	0	0	0	0.155	0	0	G195G (GGA→GGG)	A9F03_13495 →	hypothetical protein
3039234	T→G	0	0	0	0	0	0	0.136	0	0	0	0	0	0	0	P199P (CCT→CCG)	A9F03_13495 →	hypothetical protein
3039258	T→A	0	0.322	0	0	0	0.235	0.255	0.226	0	0	0	0	0.19	0	G207G (GGT→GGA)	A9F03_13495 →	hypothetical protein
3039270	G→A	0	0.181	0	0	0	0	0	0	0	0	0	0	0	0	E211E (GAG→GAA)	A9F03_13495 →	hypothetical protein
3039348	T→A	0	0	0	0.24	0	0	0	0.283	0	0	0	0	0	0	G237G (GGT→GGA)	A9F03_13495 →	hypothetical protein
3039369	T→G	0	0.197	0	0	0	0	0	0	0	0	0	0	0	0	P244P (CCT→CCG)	A9F03_13495 →	hypothetical protein
3042468	A→C	1	1	1	1	1	1	1	1	1	1	1	1	1	1	L68R (CTT→CGT)	sirA ←	two‑component system response regulator UvrY
3074046	Δ1 bp	0	0	0	0	0	0	0	0.125	0	0	0	0	0	0	coding (698/798 nt)	A9F03_13670 ←	methyltransferase
3081213	T→G	0	0	0	0	0	0	0	0.089	0	0	0	0	0	0	F133V (TTT→GTT)	A9F03_13700 →	hypothetical protein
3086449	Δ1 bp	0	0	0	0	0	0	0.167	0.412	0	0	0	0	0	0	intergenic (‑105/‑8)	A9F03_13715 ← / → A9F03_13720	type IV secretion protein IcmV/phosphoesterase
3093917	Δ1 bp	0	0	0.095	0	0	0	0	0	0	0	0	0	0	0	coding (624/801 nt)	A9F03_13745 ←	SAM‑dependent methyltransferase
3101925	G→A	0	0	0	0	0	0	0	0.071	0	0	0	0	0	0	P368L (CCT→CTT)	A9F03_13785 ←	bifunctional ADP‑dependent (S)‑NAD(P)H‑hydrate dehydratase/NAD(P)H‑hydrate epimerase
3127274	T→C	0	0	0	0.057	0	0	0	0	0	0	0	0	0	0	Y190C (TAC→TGC)	A9F03_13940 ←	tRNA‑guanine(34) transglycosylase
3134337	C→A	0	0.055	0	0	0	0	0	0	0	0	0	0	0	0	P120T (CCC→ACC)	A9F03_13975 →	hydroxymethylbilane synthase
3149466	G→A	0	0	0	0	0	0	0	0	0	0	0.267	0.267	0	0	noncoding (1537/1546 nt)	A9F03_14045 ←	16S ribosomal RNA
3162686	T→A	0	0	0	0.073	0	0	0	0	0	0	0	0	0	0	S175S (TCA→TCT)	A9F03_14100 ←	magnesium/cobalt efflux protein
3255237	C→G	0	0	0	0	0	0	0	0	0	0.095	0	0	0	0	V493L (GTT→CTT)	A9F03_14450 ←	RNA‑binding transcriptional accessory protein
3259557	A→G	0	0	0.062	0	0	0	0	0	0	0	0	0	0	0	intergenic (‑244/+120)	A9F03_14460 ← / ← A9F03_14465	glutamine‑‑fructose‑6‑phosphate aminotransferase/phospholipase
3267288	A→G	0	0	0	0	0	0	0	0	0	0	0	0	0.284	0	S268S (AGT→AGC)	A9F03_14500 ←	hypothetical protein
3277784	C→A	0	0	0	0	0	0	0	0	0	0.061	0	0	0	0	S429I (AGC→ATC)	A9F03_14545 ←	aerotolerance protein BatD
3279384	C→T	0	0	0	0	0.174	0	0	0	0	0	0	0	0	0	Q203Q (CAG→CAA)	A9F03_14550 ←	hypothetical protein
3279389	T→C	0	0	0	0	0	0	0	0	0	0	0	0.137	0	0	N202D (AAT→GAT)	A9F03_14550 ←	hypothetical protein
3279416	T→G	0.227	0	0	0	0	0	0	0	0	0	0	0	0	0	K193Q (AAG→CAG)	A9F03_14550 ←	hypothetical protein
3279472	C→T	0.242	0	0	0	0	0.173	0.234	0.164	0.309	0	0.199	0.292	0.206	0	R174Q (CGG→CAG)	A9F03_14550 ←	hypothetical protein
3279877	T→C	0	0	0	0	0	0	0	0.185	0	0	0	0	0	0	E39G (GAA→GGA)	A9F03_14550 ←	hypothetical protein
3279919	T→C	0	0	0	0	0	0	0	0	0	0.234	0	0	0	0	D25G (GAT→GGT)	A9F03_14550 ←	hypothetical protein
3296035	G→A	0.13	0	0	0	0	0	0	0	0	0	0	0	0	0	P50S (CCA→TCA)	A9F03_14635 ←	permease
3332422	Δ1 bp	0	0	0	0	0	0	0	0	0.118	0	0	0	0	0	coding (88/606 nt)	A9F03_14795 →	lysine transporter LysE
3332423	Δ1 bp	0	0	0	0	0	0	0	0	0.118	0	0	0	0	0	coding (89/606 nt)	A9F03_14795 →	lysine transporter LysE
3349379	T→C	0	0	0	0	0	0	0	0	0	0	0	0	0.095	0	K38K (AAA→AAG)	A9F03_14875 ←	transcriptional regulator
3379897	A→T	0	0	0	0	0	0	0	0	0	0	0.095	0	0	0	F147L (TTT→TTA)	A9F03_15035 ←	lipid‑A‑disaccharide synthase
3385896	A→G	0	0	0	0	0	0	0	0.057	0	0	0	0	0	0	V7A (GTT→GCT)	A9F03_15060 ←	asparagine synthase
3400078	A→G	0	0	0	0	0	0	0	0	0	0	0	0.367	0.846	1	T23T (ACT→ACC)	A9F03_15130 ←	hypothetical protein
3400081	A→T	0	0	0	0	0	0	0	0	0	0	0	0.355	0.846	1	G22G (GGT→GGA)	A9F03_15130 ←	hypothetical protein
3400087	G→A	0	0	0	0	0	0	0	0	0	0	0	0.379	0.852	1	F20F (TTC→TTT)	A9F03_15130 ←	hypothetical protein
3400098	T→C	0	0	0	0	0	0	0	0	0	0	0	0.379	0.852	1	S17G (AGT→GGT)	A9F03_15130 ←	hypothetical protein
3412325	T→A	0	0	0	0.077	0	0	0	0	0	0	0	0	0	0	intergenic (+44/‑39)	A9F03_15190 → / → A9F03_15195	threonylcarbamoyl‑AMP synthase/tRNA‑Leu
3438487	C→A	0	0	0	0	0	0	0	0	0	0.056	0	0	0	0	S453S (TCG→TCT)	A9F03_15320 ←	sulfate transporter
