# Supplementary material for: Interactions between chaperone and energy storage networks during the evolution of Legionella pneumophila under heat shock
Source: PeerJ. 2024 Apr 30;12:e17197. doi: 10.7717/peerj.17197 (PMC11067923; doi:10.7717/peerj.17197)
Supplement: Supplemental Information 7 — Table shows sampled allele frequencies at each sequenced timepoint, with bolded data showing mutations included for genetic follow-up and highlighted cell showing earliest fixation. [file peerj-12-17197-s007.xlsx]

## Sheet: HA-3
Predicted mutations
position	mutation	T3_05_output	T3_10_output	T3_15_output	T3_20_output	T3_25_output	T3_30_output	T3_35_output	T3_40_output	T3_45_output	T3_50_output	T3_55_output	T3_60_output	T3_65_output	T3_70_output	annotation	gene	description
61744	A→G	0	0	0	0	0.06	0	0	0	0	0	0	0	0	0	P29P (CCT→CCC)	A9F03_00270 ←	N‑acetyltransferase
73222	Δ1 bp	0	0	0	0	0	0	0	0	0	0	0	0	0	0.062	coding (441/927 nt)	A9F03_00335 →	hypothetical protein
86131	G→C	0	0.061	0	0	0	0	0	0	0	0	0	0	0	0	V141L (GTT→CTT)	A9F03_00400 →	Xaa‑Pro aminopeptidase
100092	A→G	0	0	0	0	0	0	0	0	0	0.077	0	0	0	0	Q135R (CAG→CGG)	A9F03_00465 →	hypothetical protein
123488	A→C	0	0	0	0	0	0	0	0	0	0	0	0	0.091	0	intergenic (‑72/‑556)	A9F03_00555 ← / → A9F03_00560	hypothetical protein/hypothetical protein
173323	Δ37,890 bp	1	1	1	1	1	1	1	1	1	1	1	1	1	1	0	A9F03_00725–A9F03_00905	37 genes A9F03_00725, A9F03_00730, A9F03_00735, A9F03_00740, A9F03_00745, A9F03_00750, A9F03_00755, A9F03_00760, A9F03_00765, A9F03_00770, A9F03_00775, A9F03_00780, A9F03_00785, A9F03_00790, A9F03_00795, A9F03_00800, A9F03_00805, A9F03_00810, A9F03_00815, A9F03_00820, A9F03_00825, A9F03_00830, A9F03_00835, A9F03_00840, A9F03_00845, A9F03_00850, A9F03_00855, A9F03_00860, A9F03_00865, A9F03_00870, …
267384	G→T	0	0	0	0	0	0	0.08	0	0	0	0	0	0	0	V135L (GTG→TTG)	A9F03_01185 →	hypothetical protein
270791	A→G	0	0	0	0	0.091	0	0	0	0	0	0	0	0	0	F162L (TTT→CTT)	A9F03_01200 ←	hypothetical protein
329742	C→T	0	0	0	0.096	0	0	0	0	0	0	0	0	0	0	R321H (CGC→CAC)	A9F03_01415 ←	NAD‑glutamate dehydrogenase
383998	G→T	0	0	0	0	0	0	0	0	0	0.065	0	0	0	0	N302K (AAC→AAA)	A9F03_01650 ←	hypothetical protein
413133	G→A	0	0	0	0	0	0	0	0	0	0	0	0.125	0	0	M298I (ATG→ATA)	A9F03_01795 →	DNA‑directed RNA polymerase subunit beta'
449418	T→C	0	0	0	0	0.06	0	0	0	0	0	0	0	0	0	F72F (TTT→TTC)	A9F03_02035 →	transcriptional repressor
459,186:1	+C	0	0	0	0	0	0	0	0	0	0	0	0.138	1	1	coding (1328/1455 nt)	A9F03_02070 ←	ribosomal protein S6 modification protein
459319	C→A	0	0	0	0	0	0	0	0	0	0	0.071	0	0	0	E399* (GAG→TAG)	A9F03_02070 ←	ribosomal protein S6 modification protein
460360	G→C	0	0	0	0	0	0	0	0.2	0	0.292	0.15	0.25	0	0	Q52E (CAA→GAA)	A9F03_02070 ←	ribosomal protein S6 modification protein
460,727:1	+T	0	0	0	0	0	0	0	0	0	0.167	0	0	0	0	coding (504/714 nt)	A9F03_02075 ←	peptidase‑C39 like family protein
474317	C→G	0	0	0	0	0	0	0	0	0.073	0	0	0	0	0	S46T (AGT→ACT)	A9F03_02145 ←	cysteine methyltransferase
491874	T→G	0	0	0	0	0	0	0	0	0	0	0	0.214	1	1	F102V (TTT→GTT)	A9F03_02245 →	ribosomal protein S6 modification protein
504202	C→T	0	0	0	0	0	0	0	0	0	0	0	0.125	0	0	intergenic (‑81/‑156)	A9F03_02305 ← / → A9F03_02310	cold shock domain protein CspD/diadenosine tetraphosphatase
511309	G→A	0	0	0	0	0	0	0	0	0	0	0.071	0	0	0	T153T (ACG→ACA)	A9F03_02350 →	SAM‑dependent methyltransferase
511589	T→A	0	0	0	0	0	0	0	0	0.24	0	0	0	0	0	intergenic (+127/+40)	A9F03_02350 → / ← A9F03_02355	SAM‑dependent methyltransferase/hypothetical protein
520753	C→T	0	0	0	0	0.071	0	0	0	0	0	0	0	0	0	A268V (GCG→GTG)	A9F03_02400 →	phosphoesterase
523896	T→A	0	0	0	0	0	0	0	0.085	0	0	0	0	0	0	S104T (TCT→ACT)	A9F03_02415 →	type IV secretion protein DotI
568852	A→G	0	0	0	0	0	0	0	0	0.067	0	0	0	0	0	I132V (ATT→GTT)	A9F03_02620 →	glutamine ABC transporter permease
613757	T→C	0	0	0	0	0	0	0	0	0	0	0	0	0.073	0	R195R (CGT→CGC)	A9F03_02830 →	dihydrolipoamide succinyltransferase
614321	T→A	0	0	0	0	0	0.083	0	0	0	0	0	0	0	0	I383I (ATT→ATA)	A9F03_02830 →	dihydrolipoamide succinyltransferase
626061	C→T	0.08	0	0	0	0	0	0	0	0	0	0	0	0	0	A113V (GCT→GTT)	A9F03_02895 →	gamma‑glutamyltransferase
643438	G→A	0	0	0	0.083	0	0	1	1	1	1	1	1	1	1	T344I (ACA→ATA)	A9F03_02990 ←	peptidase M24
697631	T→G	0	0	0	0	0	0	0	0	0.216	0	0	0	0	0	V292G (GTT→GGT)	A9F03_03260 →	tetratricopeptide repeat protein 38 family protein
740695	A→T	0	0	0	0	0	0	0	0	0	0	0	0	0.083	0	D6313V (GAC→GTC)	A9F03_03355 →	hypothetical protein
824523	G→T	0	0	0	0	0.064	0	0	0	0	0	0	0	0	0	P317P (CCG→CCT)	A9F03_03685 →	imidazolonepropionase
896741	T→C	0	0	0	0	0	0	0.083	0	0	0	0	0	0	0	N360N (AAT→AAC)	A9F03_03995 →	hypothetical protein
908983	A→G	0	0	0	0	0	0	0	0	0	0	0	0.08	0	0	I230M (ATA→ATG)	A9F03_04050 →	tRNA lysidine(34) synthetase TilS
936280	C→A	0.1	0	0	0	0	0	0	0	0	0	0	0	0	0	A54A (GCC→GCA)	A9F03_04165 →	peptidase M20
948845	C→T	0	0.08	0	0	0	0	0	0	0	0	0	0	0	0	A183V (GCG→GTG)	A9F03_04225 →	glycosyl transferase
970280	G→C	0	0	0	0	0	0	0	0.082	0	0	0	0	0	0	A140P (GCA→CCA)	A9F03_04340 →	signal peptidase
1016755	A→G	0	0	0	0	0	0.083	0	0	0	0	0	0	0	0	E56G (GAA→GGA)	A9F03_04585 →	hypothetical protein
1047056	A→G	0	0	0	0	0	0	0	0	0	0	0	0	0	0.071	V765A (GTT→GCT)	A9F03_04750 ←	peptidase
1,097,413:1	+T	0	0	0	0	0	0.077	0	0	0	0	0	0	0	0	coding (52/1347 nt)	A9F03_04930 →	peptide ABC transporter permease
1097425	A→T	0	0	0	0	0	0.22	0	0	0	0	0	0	0	0	T22S (ACC→TCC)	A9F03_04930 →	peptide ABC transporter permease
1186070	C→G	0	0	0	0	0	0	0	0	0	0.099	0	0	0	0	T1017R (ACG→AGG)	A9F03_05305 →	copper oxidase
1216839	A→G	0	0	0	0.105	0	0	0	0	0	0	0	0	0	0	C36R (TGT→CGT)	A9F03_05490 ←	ISL3 family transposase
1218329	T→C	0	0	0	0	0	0	0	0	0	0	0	0	0	0.08	E378E (GAA→GAG)	A9F03_05500 ←	hypothetical protein
1288967	T→C	0	0	0	0	0	0	0	0	0	0	0.118	0	0	0	*503* (TAA→TAG)	A9F03_05775 ←	acyl‑CoA synthetase
1377346	T→A	0	0.073	0	0	0	0	0	0	0	0	0	0	0	0	K33* (AAA→TAA)	A9F03_06155 ←	ATP phosphoribosyltransferase
1390066	A→G	0	0	0	0	0.105	0	0	0	0	0	0	0	0	0	S265P (TCT→CCT)	A9F03_06235 ←	coproporphyrinogen III oxidase
1415204	T→A	0	0	0	0	0	0	0	0	0	0	0	0	0	0.4	intergenic (‑92/+84)	A9F03_06350 ← / ← A9F03_06355	restriction endonuclease/hypothetical protein
1426104	A→G	0	0	0	0	0	0	0	0	0	0	0	0	0.326	0	H173H (CAT→CAC)	A9F03_06400 ←	hypothetical protein
1426127	C→A	0	0	0	0	0	0	0	0	0	0	0.205	0	0	0	V166F (GTT→TTT)	A9F03_06400 ←	hypothetical protein
1,465,091:1	+T	0	0	0	0	0	0	0	0	0	0	0	0	0	0.105	coding (1551/1587 nt)	A9F03_06625 ←	hypothetical protein
1,465,091:2	+T	0	0	0	0	0	0	0	0	0	0	0	0	0	0.105	coding (1551/1587 nt)	A9F03_06625 ←	hypothetical protein
1,465,091:3	+C	0	0	0	0	0	0	0	0	0	0	0	0	0	0.105	coding (1551/1587 nt)	A9F03_06625 ←	hypothetical protein
1,465,091:4	+T	0	0	0	0	0	0	0	0	0	0	0	0	0	0.105	coding (1551/1587 nt)	A9F03_06625 ←	hypothetical protein
1,465,091:5	+C	0	0	0	0	0	0	0	0	0	0	0	0	0	0.105	coding (1551/1587 nt)	A9F03_06625 ←	hypothetical protein
1,465,091:6	+A	0	0	0	0	0	0	0	0	0	0	0	0	0	0.105	coding (1551/1587 nt)	A9F03_06625 ←	hypothetical protein
1,465,091:7	+G	0	0	0	0	0	0	0	0	0	0	0	0	0	0.105	coding (1551/1587 nt)	A9F03_06625 ←	hypothetical protein
1,465,091:8	+T	0	0	0	0	0	0	0	0	0	0	0	0	0	0.105	coding (1551/1587 nt)	A9F03_06625 ←	hypothetical protein
1,465,091:9	+T	0	0	0	0	0	0	0	0	0	0	0	0	0	0.105	coding (1551/1587 nt)	A9F03_06625 ←	hypothetical protein
1521867	G→T	0	0	0	0.137	0	0	0	0	0	0	0	0	0	0	T246K (ACA→AAA)	A9F03_06850 ←	MFS transporter
1563393	G→A	0	0	0.333	0	0	0	1	1	1	1	1	1	1	1	G83E (GGG→GAG)	A9F03_07020 →	molecular chaperone HtpG
1563447	C→T	0	0	0.312	0	0.88	1	0	0	0	0	0	0	0	0	S101F (TCC→TTC)	A9F03_07020 →	molecular chaperone HtpG
1568676	G→A	0	0	0	0	0	0	0.3	0.786	1	1	0.714	1	1	1	P332S (CCG→TCG)	A9F03_07045 ←	rod shape‑determining protein RodA
1686893	A→C	0	0	0	0	0	0	0	0	0	0	0.086	0	0	0	N124T (AAC→ACC)	A9F03_07590 →	protein kinase
1702117	A→G	0	0.091	0	0	0	0	0	0	0	0	0	0	0	0	intergenic (+6/‑232)	A9F03_07650 → / → A9F03_07655	hypothetical protein/aminopeptidase N
1727108	A→G	0	0	0	0	0	0	0	0.095	0	0	0	0	0	0	K718E (AAA→GAA)	A9F03_07750 →	peptidase C39
1732768	A→G	0	0	0	0	0	0	0	0.166	0	0	0	0	0	0	intergenic (‑13/‑246)	A9F03_07775 ← / → A9F03_07780	methyltransferase/type IV‑A pilus assembly ATPase PilB
1733728	T→C	0	0	0	0	0	0	0	0	0.08	0	0	0	0	0	L239L (TTG→CTG)	A9F03_07780 →	type IV‑A pilus assembly ATPase PilB
1757942	A→G	0	0	0	0	0	0.071	0	0	0	0	0	0	0	0	L33P (CTC→CCC)	A9F03_07890 ←	histidine‑‑tRNA ligase
1836375	G→C	0	0	0	0	0	0	0	0	0	0	0	0.063	0	0	A293G (GCT→GGT)	A9F03_08270 ←	cell division protein FtsI
1837825	C→A	0.127	0	0	0	0	0	0	0	0	0	0	0	0	0	intergenic (‑154/+37)	A9F03_08275 ← / ← A9F03_08280	transcriptional regulator/type IV secretion protein Dot
1917987	C→T	0	0	0	0	0	0	0	0	0	0	0	0	0.279	0	intergenic (‑67/+4)	A9F03_08575 ← / ← A9F03_08580	hypothetical protein/hypothetical protein
1924592	A→T	0	0	0	0	0	0	0	0	0.074	0	0	0	0	0	*466C (TGA→TGT)	A9F03_08600 →	hypothetical protein
1984653	A→G	0	0	0	0	0	0	0	0	0	0	0	0.066	0	0	K13K (AAA→AAG)	A9F03_08845 →	glutamyl‑tRNA amidotransferase
1993240	C→A	0	0	0	0	0	0	0	0.083	0.533	0	0	0	0	0	intergenic (‑28/+83)	rnpB ← / ← A9F03_08885	RNase P RNA component class A/Fis family transcriptional regulator
2000161	C→T	0	0	0	0	0.062	0	1	1	1	1	1	1	1	1	A478V (GCA→GTA)	A9F03_08920 →	ATP‑dependent chaperone ClpB
2131724	C→T	0	0	0	0	0	0	0	0	0	0.13	0	0.25	0	0	G204S (GGT→AGT)	A9F03_09480 ←	ATP‑dependent protease ATP‑binding subunit ClpX
2144319	T→C	0	0	0	0	0	0	0	0	0	0	0.083	0	0	0	W244R (TGG→CGG)	A9F03_09550 →	general secretion pathway protein GspL
2164655	G→T	0	0	0	0	0	0	0	0	0	0	0	0	0.088	0	L468L (CTG→CTT)	A9F03_09665 →	potassium transporter
2224465	A→C	0	0	0	0	0	0	0	0	0	0.093	0	0	0	0	Y153D (TAT→GAT)	A9F03_09920 ←	hypothetical protein
2,271,168:1	+C	0	0	0	0	0	0	0	0	0	0	0	0	0	0.115	coding (224/1200 nt)	A9F03_10105 →	3‑hydroxy‑3‑methylglutaryl‑CoA reductase
2313093	A→G	0	0	0	0.136	0	0	0	0	0	0	0	0	0	0	W366R (TGG→CGG)	A9F03_10315 ←	molecular chaperone DnaJ
2313188	G→A	0	0	0.174	0.593	0	0	0	0	0	0	0	0	0	0	P334L (CCG→CTG)	A9F03_10315 ←	molecular chaperone DnaJ
2313189	G→A	0	0	0	0	0.1	0	1	1	1	1	1	1	1	1	P334S (CCG→TCG)	A9F03_10315 ←	molecular chaperone DnaJ
2313905	A→T	0.143	0	0	0	0	0	0	0	0	0	0	0	0	0	F95Y (TTT→TAT)	A9F03_10315 ←	molecular chaperone DnaJ
2316031	C→T	0	0	0	0	0.917	1	0	0	0	0	0	0	0	0	M94I (ATG→ATA)	A9F03_10320 ←	molecular chaperone DnaK
2323904	A→T	0.066	0	0	0	0	0	0	0	0	0	0	0	0	0	L74H (CTC→CAC)	A9F03_10355 ←	AI‑2E family transporter
2432292	Δ1 bp	0	0	0	0	0	0	0	0	0	0.111	0	0	0	0	intergenic (‑159/+200)	A9F03_10890 ← / ← A9F03_10895	cellobiose phosphorylase/calmodulin
2432872	A→G	0	0	0	0	0	0	0	0	0	0.164	0	0	0	0	S413P (TCA→CCA)	A9F03_10895 ←	calmodulin
2460353	C→A	0	0	0	0	0	0	0.08	0	0	0	0	0	0	0	V509V (GTC→GTA)	A9F03_10990 →	septation initiation protein
2486195	C→A	0	0.414	0	0	0	0	0	0	0	0	0	0	0	0	L118F (TTG→TTT)	A9F03_11070 ←	adenosylhomocysteinase
2560027	A→C	0	0	0	0	0	0	0.063	0	0	0	0	0	0	0	intergenic (‑347/‑3)	A9F03_11315 ← / → A9F03_11320	hypothetical protein/hypothetical protein
2595579	A→T	0	0	0	0	0	0	0	0.1	0	0	0	0	0	0	S117T (TCT→ACT)	A9F03_11445 ←	hypothetical protein
2634539	G→C	0	0	0	0	0	0	0	0	0.188	0	0	0	0	0	A118G (GCT→GGT)	A9F03_11635 ←	lipoprotein releasing system, ATP‑binding protein
2640348	G→A	0	0	0	0	0	0	0	0	0	0.095	0	0	0	0	S77S (TCC→TCT)	A9F03_11680 ←	HAD family hydrolase
2651452	G→A	0	0	0	0	0	0	0	0	0	0	0.13	0	0	0	A120V (GCA→GTA)	A9F03_11710 ←	DNA mismatch repair protein MutS
2651587	C→T	0	0	0	0	0	0	0	0	0	0	0.077	0	0	0	C75Y (TGC→TAC)	A9F03_11710 ←	DNA mismatch repair protein MutS
2699348	A→T	0	0	0	0	0	0	0	0	0	0	0.264	0	0	0	M110K (ATG→AAG)	A9F03_11945 ←	transcriptional regulator
2704178	Δ1 bp	0	0	0	0	0	0	1	1	1	1	1	1	1	1	coding (368/852 nt)	A9F03_11970 →	hypothetical protein
2704462	C→T	0	0	0	0	0	0.115	0	0	0	0	0	0	0	0	Q218* (CAA→TAA)	A9F03_11970 →	hypothetical protein
2704499	G→C	0	0	0	0	0	0.409	0	0	0	0	0	0	0	0	G230A (GGT→GCT)	A9F03_11970 →	hypothetical protein
2708645	T→C	0	0	0	0	0	0	0.064	0	0	0	0	0	0	0	K103K (AAA→AAG)	A9F03_11990 ←	amidase
2716483	G→T	0	0	0	0	0	0	0	0	0	0	0.161	0	0	0	N356K (AAC→AAA)	A9F03_12030 ←	ISL3 family transposase
2725795	A→T	0	0	0.08	0	0	0	0	0	0	0	0	0	0	0	N115I (AAT→ATT)	A9F03_12080 →	hypothetical protein
2731013	T→A	0	0	0	0	0	0	0	0	0	0	0	0	0	0.081	intergenic (+192/‑249)	A9F03_12110 → / → A9F03_12115	LysR family transcriptional regulator/transcriptional regulator
2734025	A→T	0	0	0	0.069	0	0	0	0	0	0	0	0	0	0	D396V (GAT→GTT)	A9F03_12135 →	magnesium‑translocating P‑type ATPase
2810329	A→T	0	0	0	0	0	0	0	0	0	0.221	0	0	0	0	intergenic (+39/‑44)	A9F03_12480 → / → A9F03_12485	D‑alanyl‑D‑alanine dipeptidase/hypothetical protein
2849356	T→C	0	0	0	0	0	0	0	0	0.087	0	0	0	0	0	K123R (AAA→AGA)	A9F03_12670 ←	phosphomannomutase/phosphoglucomutase
2854185	A→T	0	0	0	0	0	0	0	0	0	0.144	0	0	0	0	I557F (ATT→TTT)	A9F03_12695 →	type IV secretion protein Dot
2887090	A→C	0	0	0	0	0	0	0	0	0.157	0	0	0	0	0	R567R (CGT→CGG)	A9F03_12820 ←	transporter
2919916	T→C	0	0	0	0	0	0	0	0	0.08	0	0	0	0	0	intergenic (‑495/+156)	A9F03_12955 ← / ← A9F03_12960	hypothetical protein/hypothetical protein
2924448	A→G	0	0	0	0	0	0.105	0	0	0	0	0	0	0	0	S134G (AGC→GGC)	A9F03_12985 →	murein transglycosylase
2930312	C→G	0	0	0	0	0	0.12	0	0	0	0	0	0	0	0	A73P (GCT→CCT)	A9F03_13015 ←	AraC family transcriptional regulator
2930339	G→T	0	0	0	0	0	0	0	0	0	0	0	0	0.202	0	Q64K (CAA→AAA)	A9F03_13015 ←	AraC family transcriptional regulator
2976986	G→A	0	0	0	0	0	0.059	0	0	0	0	0	0	0	0	Q29* (CAG→TAG)	A9F03_13250 ←	peptide deformylase
3038974	T→C	0	0	0	0	0	0	0	0	0	0	0	0	0.193	0	S113P (TCA→CCA)	A9F03_13495 →	hypothetical protein
3039127	C→A	0	0	0	0	0	0	0	0	0	0	0	0	0	0.128	Q164K (CAA→AAA)	A9F03_13495 →	hypothetical protein
3039213	T→A	0	0	0	0	0	0	0	0.251	0.245	0	0	0	0	0	G192G (GGT→GGA)	A9F03_13495 →	hypothetical protein
3039348	T→A	0	0	0	0	0	0	0	0	0.26	0	0.253	0.184	0.272	0	G237G (GGT→GGA)	A9F03_13495 →	hypothetical protein
3039357	A→G	0	0	0	0	0	0	0	0	0	0	0	0	0	0.193	G240G (GGA→GGG)	A9F03_13495 →	hypothetical protein
3042468	A→C	1	1	1	1	1	1	1	1	1	1	1	1	1	1	L68R (CTT→CGT)	sirA ←	two‑component system response regulator UvrY
3043836	C→T	0.077	0	0	0	0	0	0	0	0	0	0	0	0	0	intergenic (‑223/‑216)	A9F03_13510 ← / → A9F03_13515	phenylalanine 4‑monooxygenase/competence protein
3075325	A→G	0	0	0	0	0	0	0.074	0	0	0	0	0	0	0	R131R (CGT→CGC)	A9F03_13675 ←	dihydrofolate reductase
3112772	C→A	0	0	0.354	0	0	0	0	0	0	0	0	0	0	0	intergenic (‑111/+26)	A9F03_13840 ← / ← A9F03_13845	phenylalanine‑‑tRNA ligase subunit alpha/50S ribosomal protein L20
3120593	C→A	0	0	0	0	0	0	0	0.064	0	0	0	0	0	0	S205Y (TCT→TAT)	A9F03_13900 →	glutamate‑‑cysteine ligase
3171040	G→A	0	0	0	0.08	0	0	0	0	0	0	0	0	0	0	S590S (AGC→AGT)	A9F03_14145 ←	translation initiation factor IF‑2
3172087	Δ162 bp	0	0	0	0	0	0	0	0	0	0	0	0.444	0	0	coding (562‑723/2607 nt)	A9F03_14145 ←	translation initiation factor IF‑2
3267282	G→A	0	0	0	0	0	0	0	0	0	0	0	0	0.16	0	S270S (TCC→TCT)	A9F03_14500 ←	hypothetical protein
3267288	A→G	0	0.292	0	0	0	0.253	0	0	0	0	0.375	0	0.304	0	S268S (AGT→AGC)	A9F03_14500 ←	hypothetical protein
3274505	G→A	0	0	0	0	0.062	0	0	0	0	0	0	0	0	0	P339S (CCG→TCG)	A9F03_14535 ←	protoporphyrinogen oxidase
3276339	T→A	0	0	0	0	0	0	0	0	0	0	0	0	0	0.071	E282V (GAA→GTA)	A9F03_14540 ←	amidase
3279384	C→T	0	0	0	0	0.209	0	0	0.167	0	0	0	0	0	0	Q203Q (CAG→CAA)	A9F03_14550 ←	hypothetical protein
3279396	C→T	0	0	0	0	0	0	0	0	0	0	0.221	0	0	0	Q199Q (CAG→CAA)	A9F03_14550 ←	hypothetical protein
3279472	C→T	0.277	0	0.327	0	0.206	0	0.26	0.219	0	0	0.424	0	0.281	0	R174Q (CGG→CAG)	A9F03_14550 ←	hypothetical protein
3281724	A→T	0	0	0	0	0	0	0	0	0	0	0.064	0	0	0	S74S (TCT→TCA)	A9F03_14560 ←	hypothetical protein
3308505	T→A	0	0	0	0	0	0.061	0	0	0	0	0	0	0	0	T35S (ACG→TCG)	A9F03_14680 ←	hypothetical protein
3312033	G→T	0	0.084	0	0	0	0	0	0	0	0	0	0	0	0	Q30K (CAA→AAA)	metG ←	methionine‑‑tRNA ligase
3318182	A→G	0	0	0	0	0.057	0	0	0	0	0	0	0	0	0	I359V (ATA→GTA)	A9F03_14725 →	hypothetical protein
3351575	T→A	0	0.118	0	0	0	0	0	0	0	0	0	0	0	0	D38V (GAT→GTT)	A9F03_14890 ←	pyridine nucleotide‑disulfide oxidoreductase
3361855	T→C	0	0	0.115	0	0	0	0	0	0	0	0	0	0	0	D237G (GAT→GGT)	A9F03_14940 ←	helicase
3389714	A→C	0	0	0	0	0	0	0	0	0	0	0	0.115	0	0	N236K (AAT→AAG)	A9F03_15085 ←	hypothetical protein
3400078	A→G	0	0	0	0	0	0	0	0	0.367	0.12	0	0.194	1	1	T23T (ACT→ACC)	A9F03_15130 ←	hypothetical protein
3400081	A→T	0	0	0	0	0	0	0	0	0.376	0.12	0	0.194	1	1	G22G (GGT→GGA)	A9F03_15130 ←	hypothetical protein
3400087	G→A	0	0	0	0	0	0	0	0	0.367	0.115	0	0.189	1	1	F20F (TTC→TTT)	A9F03_15130 ←	hypothetical protein
3400094	G→A	0	0	0	0	0	0	0	0	0.179	0.208	0.4	0.25	0	0	A18V (GCA→GTA)	A9F03_15130 ←	hypothetical protein
3400098	T→C	0	0	0	0	0	0	0	0	0.393	0.125	0	0.194	1	1	S17G (AGT→GGT)	A9F03_15130 ←	hypothetical protein
3400110	C→T	0	0	0	0	0	0	0	0	0	0	0.15	0.171	0	0	A13T (GCT→ACT)	A9F03_15130 ←	hypothetical protein
3414840	T→C	0	0	0	0	0	0	0	0	0	0.08	0	0	0	0	E392G (GAA→GGA)	A9F03_15205 ←	hypothetical protein
