# Supplementary material for: Interactions between chaperone and energy storage networks during the evolution of Legionella pneumophila under heat shock
Source: PeerJ. 2024 Apr 30;12:e17197. doi: 10.7717/peerj.17197 (PMC11067923; doi:10.7717/peerj.17197)
Supplement: Supplemental Information 20 [file peerj-12-17197-s020.xls]

## Sheet: Sheet1
ITEM TO CHECK	IMPORTANCE	CHECKLIST
EXPERIMENTAL DESIGN
Definition of experimental and control groups	E	L224-228
Number within each group	E	L226
Assay carried out by core lab or investigator's lab?	D	Investigators
Acknowledgement of authors' contributions	D	yes
SAMPLE
Description	E	L226-228
Volume/mass of sample processed	D	L226-228
Microdissection or macrodissection	E	na
Processing procedure	E	L226-228
If frozen - how and how quickly?	E	na
If fixed - with what, how quickly?	E	na
Sample storage conditions and duration (especially for FFPE samples)	E	na
NUCLEIC ACID EXTRACTION
Procedure and/or instrumentation	E	L226
Name of kit and details of any modifications	E	L226
Source of additional reagents used	D	na
Details of DNase or RNAse treatment	E	L228-229
Contamination assessment (DNA or RNA)	E	L229
Nucleic acid quantification	E	L229
Instrument and method	E	L229
Purity (A260/A280)	D	>1.9
Yield	D	>200 ng/ul
RNA integrity method/instrument	E	not done
RIN/RQI or Cq of 3' and 5' transcripts	E	not done
Electrophoresis traces	D	not done
Inhibition testing (Cq dilutions, spike or other)	E	not done
REVERSE TRANSCRIPTION
Complete reaction conditions	E	L230-232
Amount of RNA and reaction volume	E	L231
Priming oligonucleotide (if using GSP) and concentration	E	L231
Reverse transcriptase and concentration	E	L231
Temperature and time	E	L230-231
Manufacturer of reagents and catalogue numbers	D	L230-232
Cqs with and without RT	D*	miqe-controls
Storage conditions of cDNA	D	na
qPCR TARGET INFORMATION
If multiplex, efficiency and LOD of each assay.	E	na
Sequence accession number	E	L179
Location of amplicon	D
Amplicon length	E	Table S2
In silico specificity screen (BLAST, etc)	E	primer-blast
Pseudogenes, retropseudogenes or other homologs?	D	na
Sequence alignment	D	na
Secondary structure analysis of amplicon	D	na
Location of each primer by exon or intron (if applicable)	E	na
What splice variants are targeted?	E	na
qPCR OLIGONUCLEOTIDES
Primer sequences	E	Table S2
RTPrimerDB Identification Number	D	na
Probe sequences	D**	na
Location and identity of any modifications	E	none
Manufacturer of oligonucleotides	D	IDT
Purification method	D	na
qPCR PROTOCOL
Complete reaction conditions	E	L232-239
Reaction volume and amount of cDNA/DNA	E	L235-236
Primer, (probe), Mg++ and dNTP concentrations	E	L236
Polymerase identity and concentration	E	L235-236
Buffer/kit identity and manufacturer	E	L235-236
Exact chemical constitution of the buffer	D	na
Additives (SYBR Green I, DMSO, etc.)	E	L235-236
Manufacturer of plates/tubes and catalog number	D	L235
Complete thermocycling parameters	E	L237-238
Reaction setup (manual/robotic)	D	manual
Manufacturer of qPCR instrument	E	L234
qPCR VALIDATION
Evidence of optimisation (from gradients)	D	no
Specificity (gel, sequence, melt, or digest)	E	melt curves
For SYBR Green I, Cq of the NTC	E	miqe-controls
Standard curves with slope and y-intercept	E	miqe-primer-validation
PCR efficiency calculated from slope	E	Table S2
Confidence interval for PCR efficiency or standard error	D	no
r2 of standard curve	E	Table S2
Linear dynamic range	E	miqe-primer-validation
Cq variation at lower limit	E	no
Confidence intervals throughout range	D	no
Evidence for limit of detection	E	no
If multiplex, efficiency and LOD of each assay.	E	no
DATA ANALYSIS
qPCR analysis program (source, version)	E	7500 Fast Software
Cq method determination	E	Threshold
Outlier identification and disposition	E	Automatic
Results of NTCs	E	miqe-controls
Justification of number and choice of reference genes	E	L240
Description of normalisation method	E	L239-242
Number and concordance of biological replicates	D	L226
Number and stage (RT or qPCR) of technical replicates	E	L234
Repeatability (intra-assay variation)	E	raw data
Reproducibility (inter-assay variation, %CV)	D	na
Power analysis	D	none
Statistical methods for result significance	E	L240-241
Software (source, version)	E	L239
Cq or raw data submission using RDML	D	no
Table 1. MIQE checklist for authors, reviewers and editors. All essential information (E) must be submitted with the manuscript. Desirable
information (D) should be submitted if available. If using primers obtained from RTPrimerDB, information on qPCR target, oligonucleotides,
protocols and validation is available from that source.
*: Assessing the absence of DNA using a no RT assay is essential when first extracting RNA. Once the sample has been validated as
RDNA-free, inclusion of a no-RT control is desirable, but no longer essential.
**: Disclosure of the probe sequence is highly desirable and strongly encouraged. However, since not all commercial pre-designed assay
vendors provide this information, it cannot be an essential requirement. Use of such assays is advised against.
